# Supplementary material for: Design, synthesis and biological evaluation of VEGFR-2/HDAC dual inhibitors as multitargeted antitumor agents based on fruquintinib and vorinostat
Source: Royal Society of Chemistry journal article supplement (doi:10.1039/d3ra05542f), 2023-01-01

## Design, synthesis and biological evaluation of VEGFR-2/HDAC dual inhibitors as multitargeted antitumor agents based on the Fruquintinib and Vorinostat

### $^1\text{H-NMR}$ of intermediate **3a**

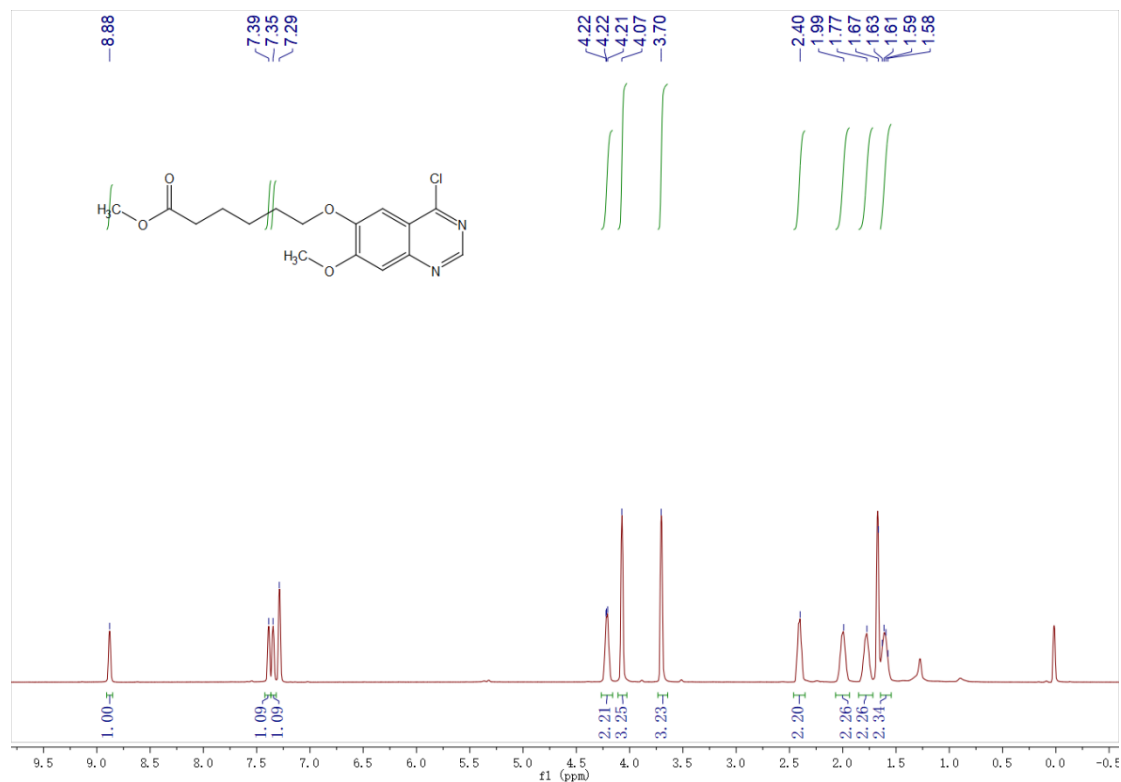

### $^1\text{H-NMR}$ of intermediate **3b**

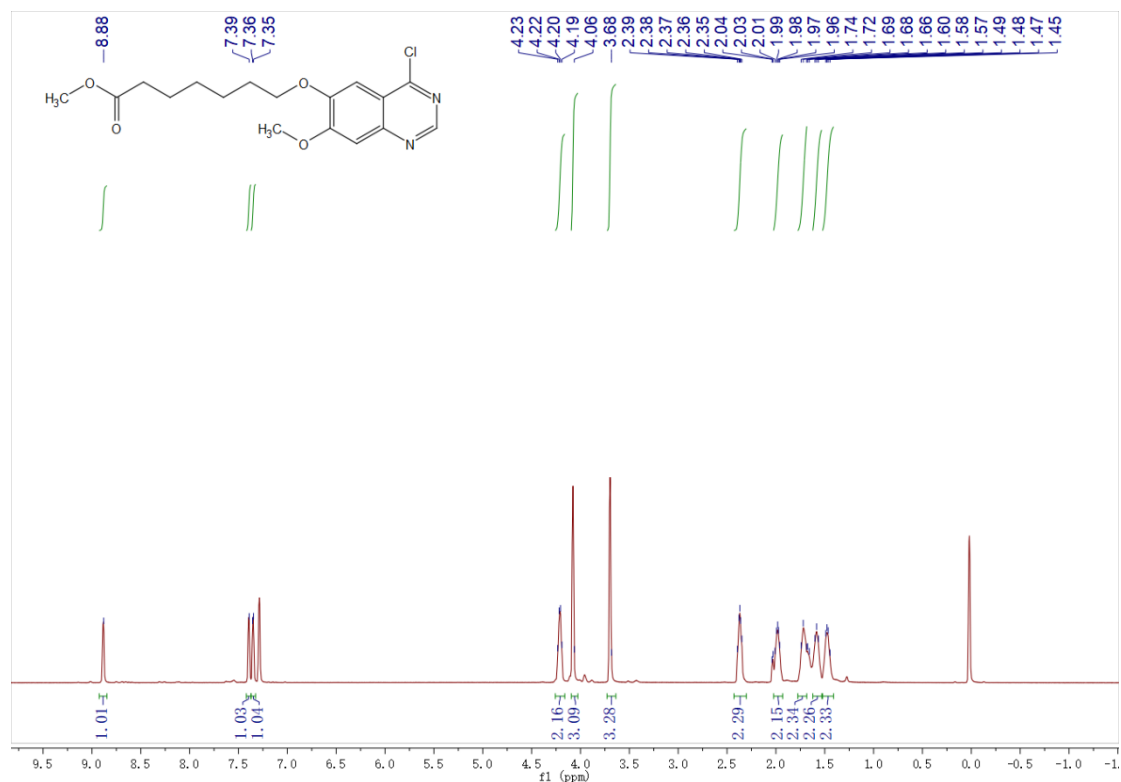

### <sup>1</sup>H-NMR of intermediate 3c

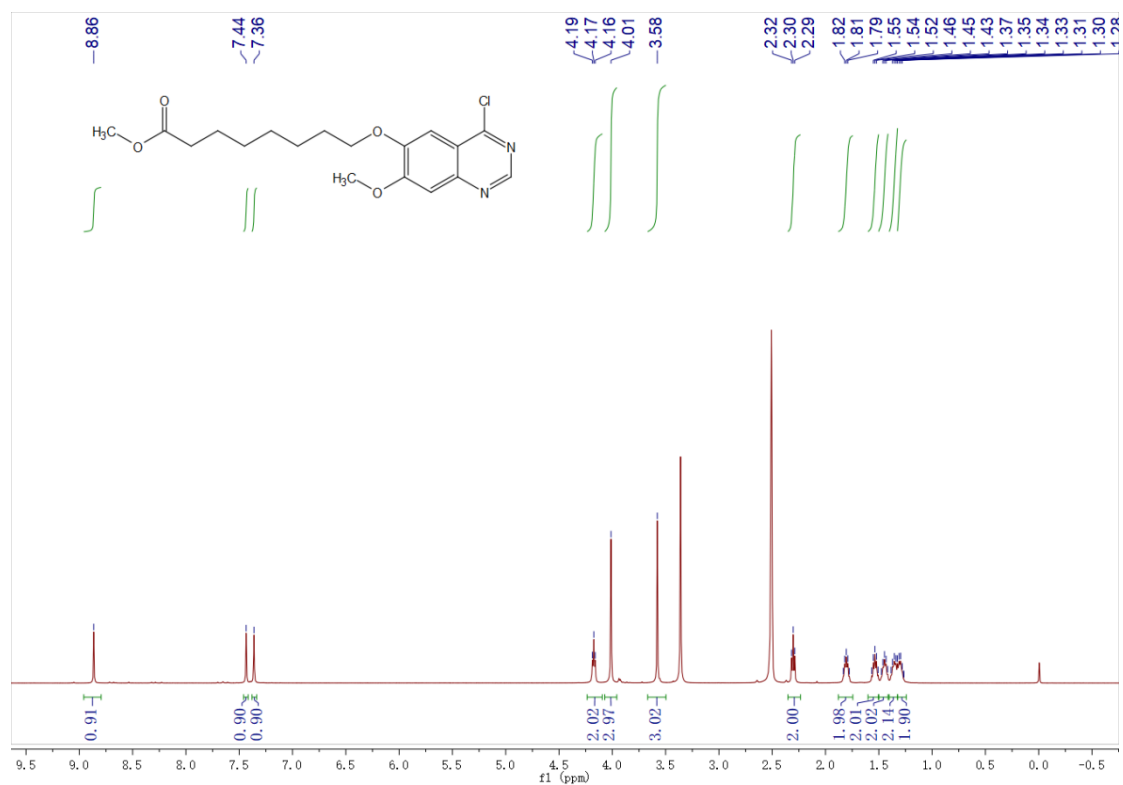

### <sup>1</sup>H-NMR of intermediate 4

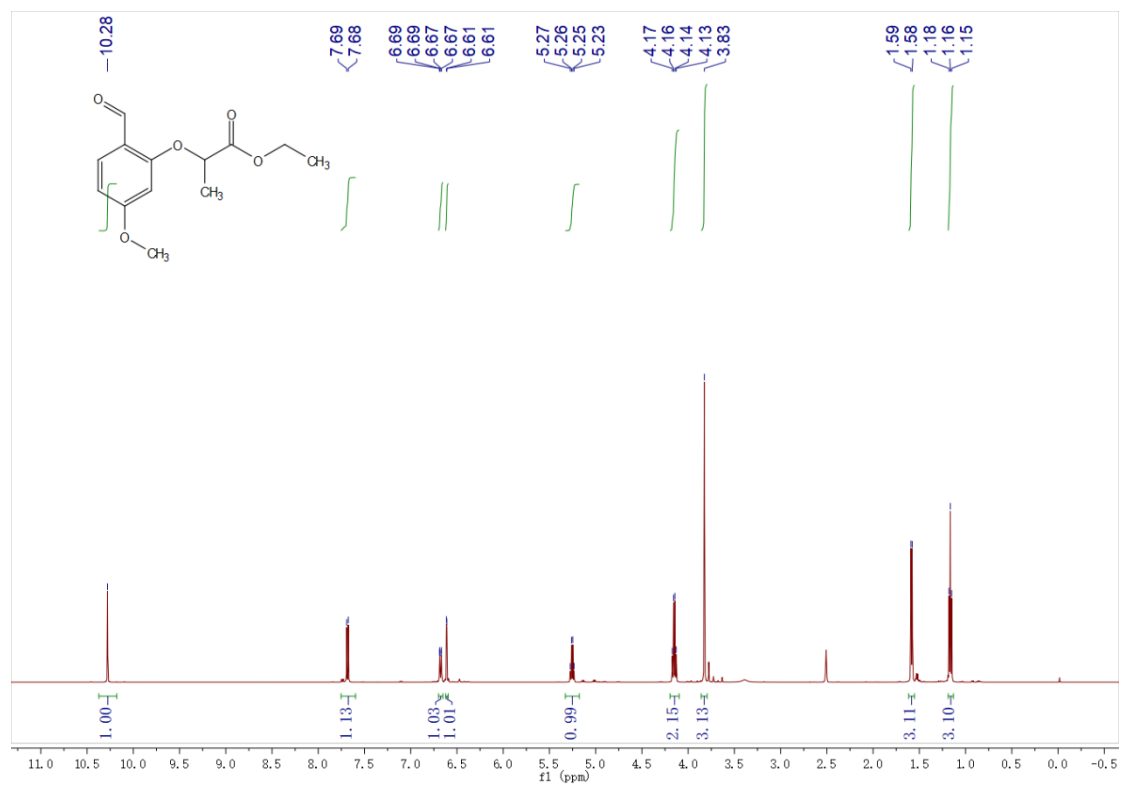

### <sup>1</sup>H-NMR of intermediate 5

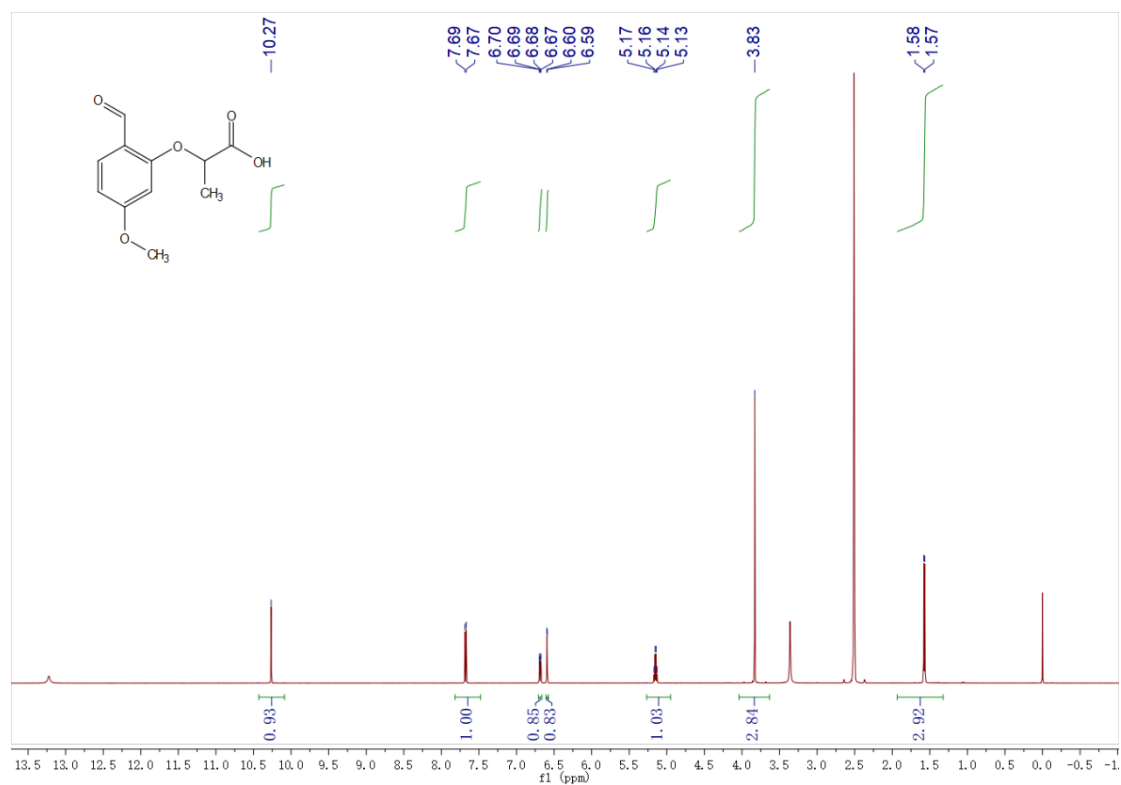

### <sup>1</sup>H-NMR of intermediate 6

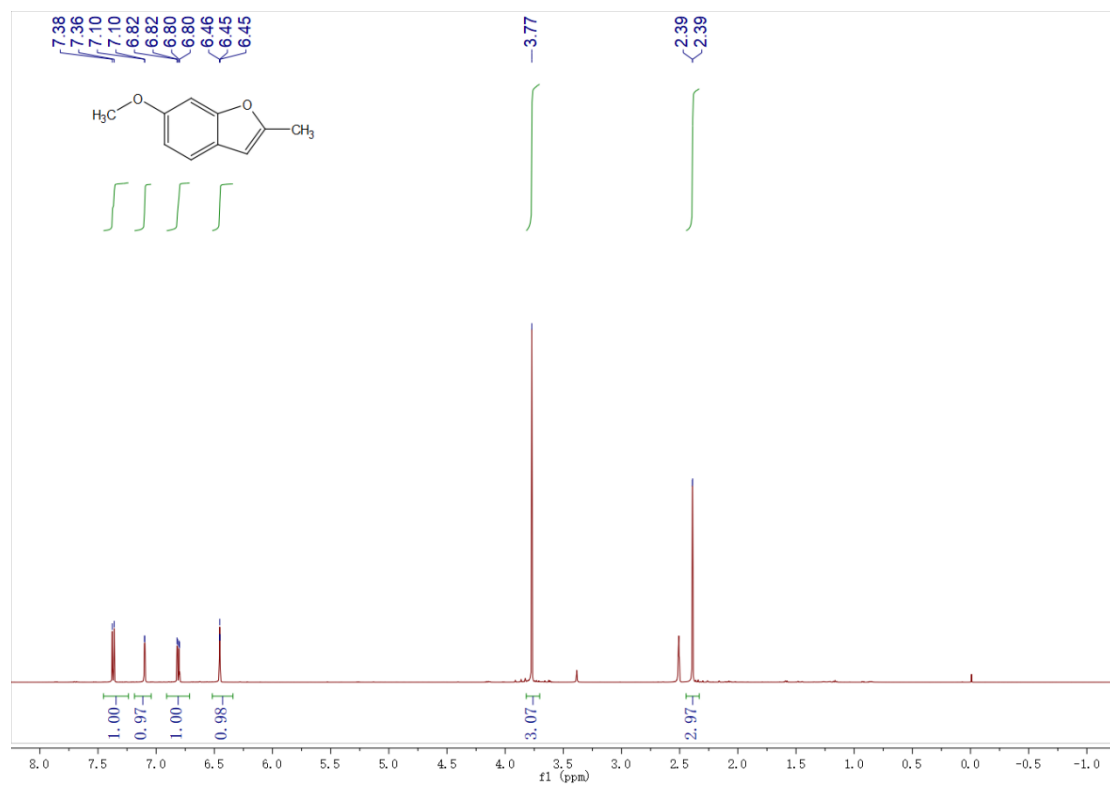

### <sup>1</sup>H-NMR of intermediate 7

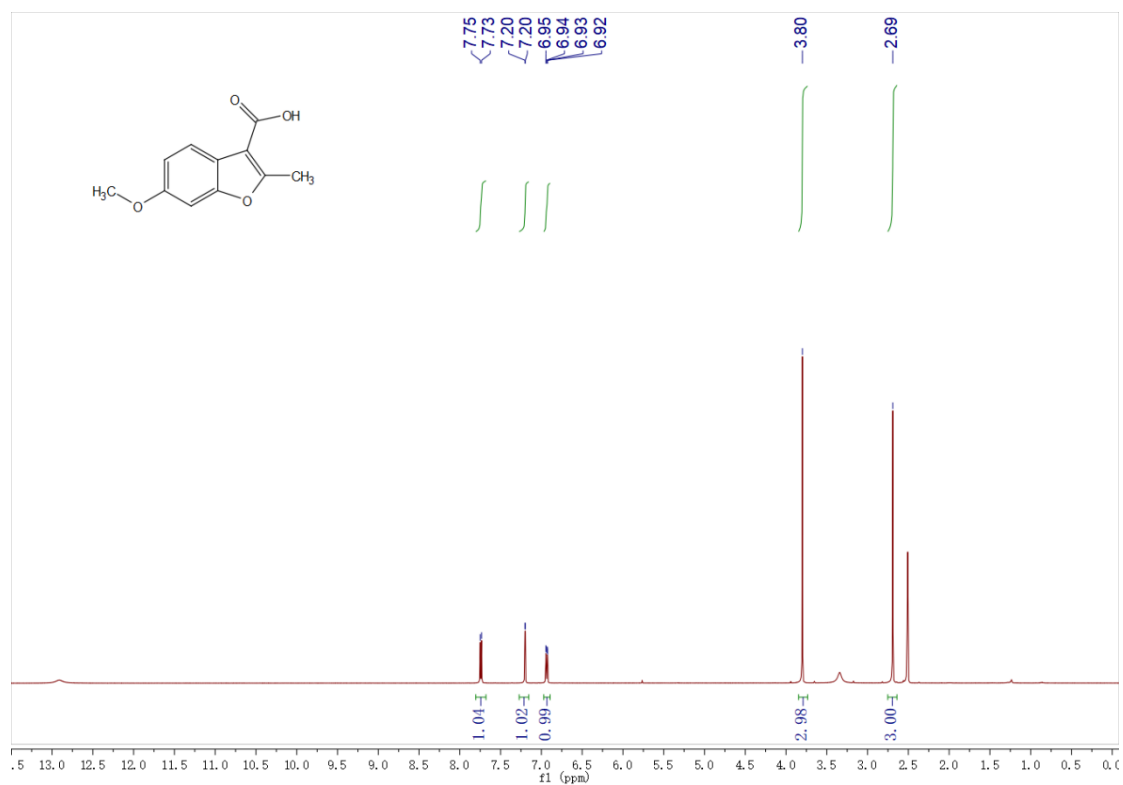

### <sup>1</sup>H-NMR of intermediate 8

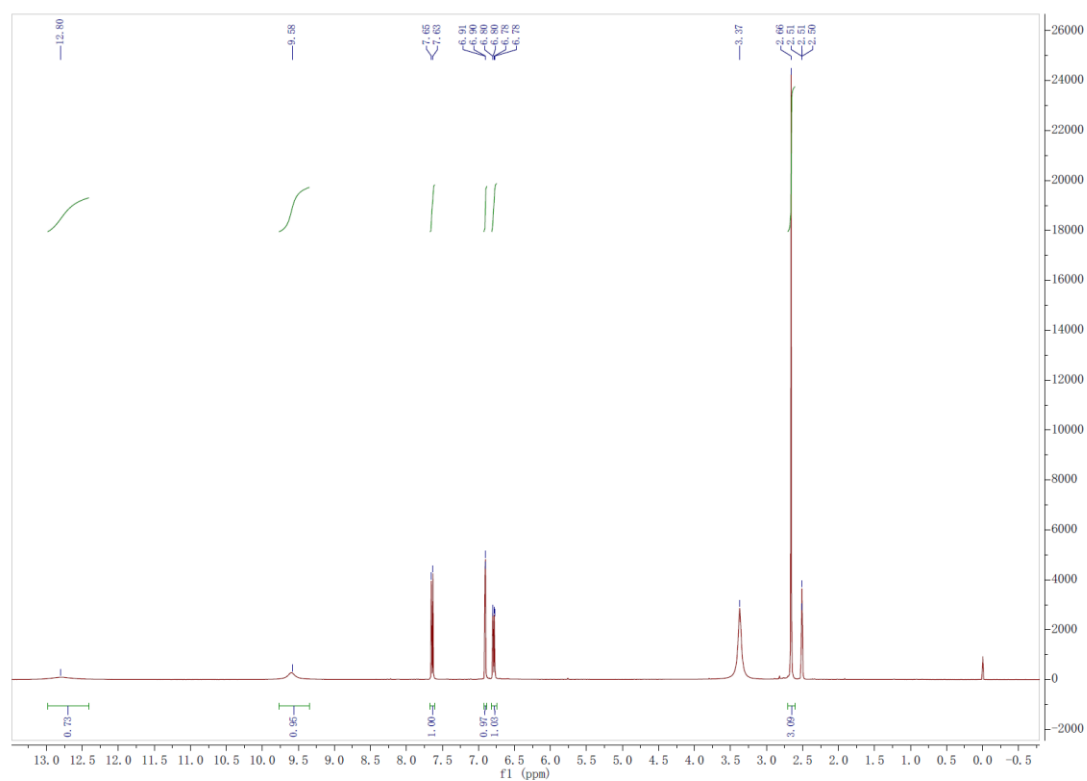

### <sup>1</sup>H-NMR of intermediate **9a**

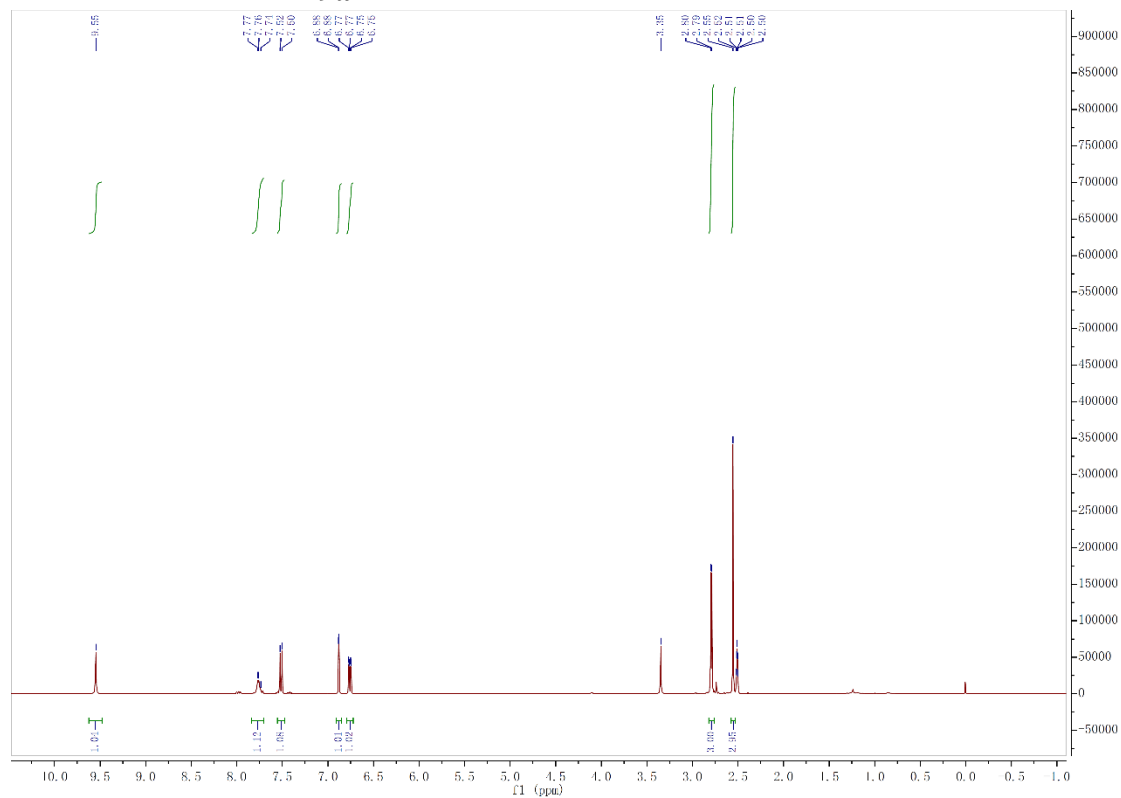

### <sup>1</sup>H-NMR of intermediate **9b**

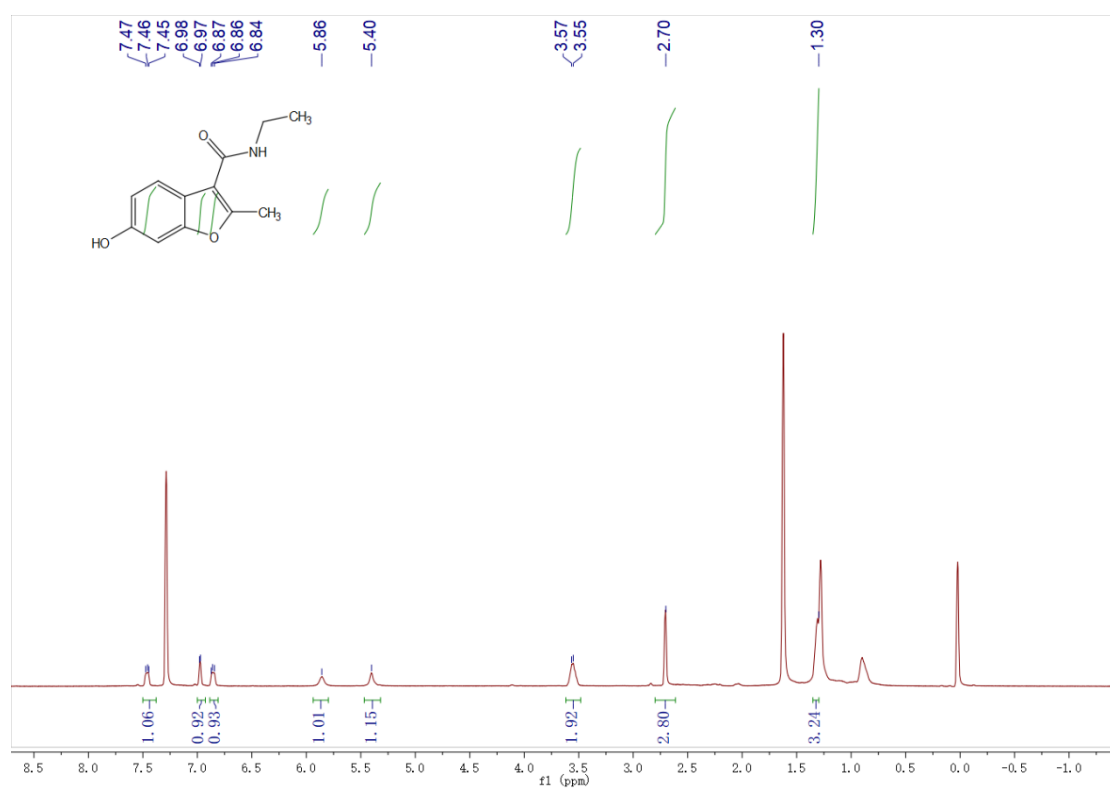

### <sup>1</sup>H-NMR of intermediate 9c

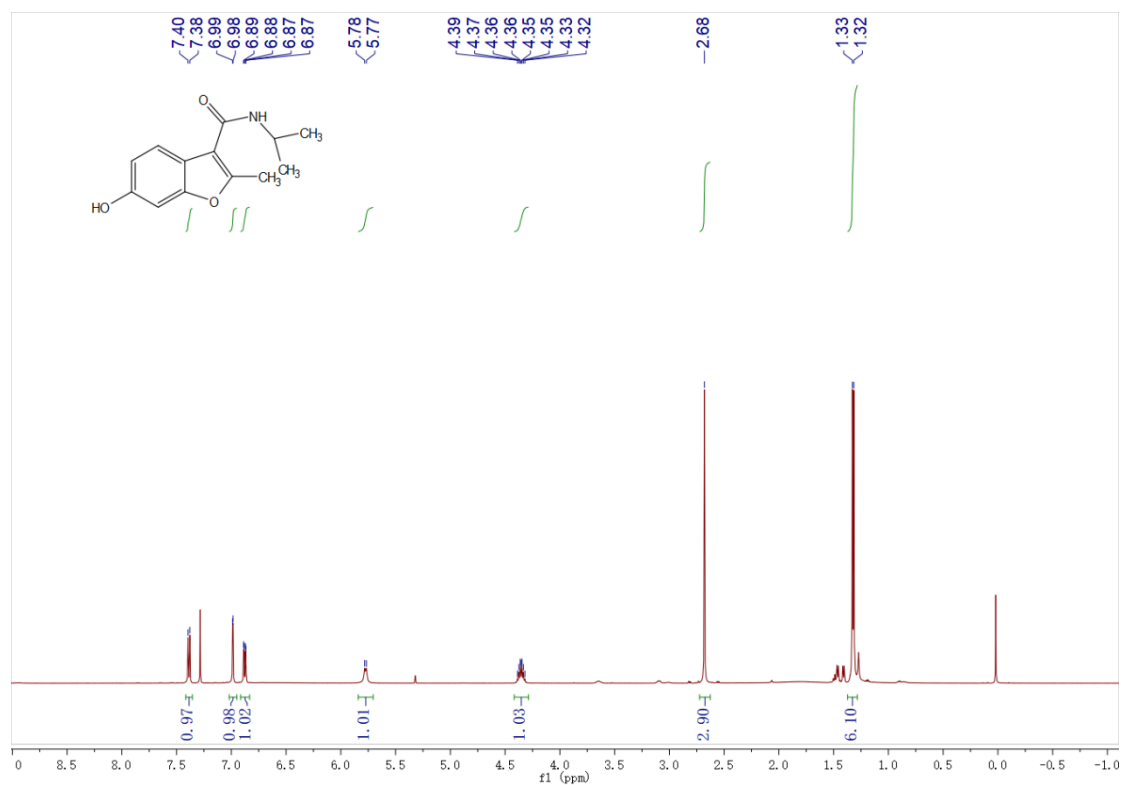

### HRMS (ESI) of intermediate 10a

#### 谱图报告

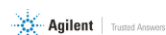

|           |          |          |                           |              |                                |
|-----------|----------|----------|---------------------------|--------------|--------------------------------|
| 名称        | Sample29 | 样品架位置    | 仪器                        | Instrument 1 | 操作者                            |
| 进样体积 (ul) | 5        | 样品盘位置    | IRM 状态                    | 所有丢失的离子      |                                |
| 数据文件      | LF-10A.d | 方法 (Acq) | 80mech20water-10min-neg.m | 采集时间 (本地)    | 2023/5/18 15:40:19 (UTC+08:00) |

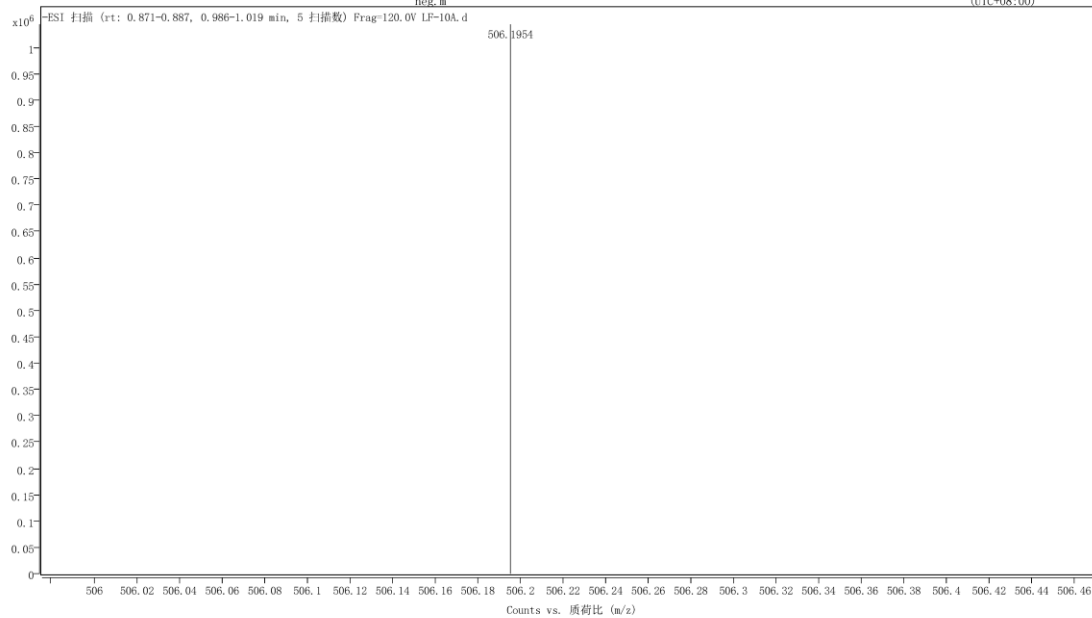

## HRMS (ESI) of intermediate 10b

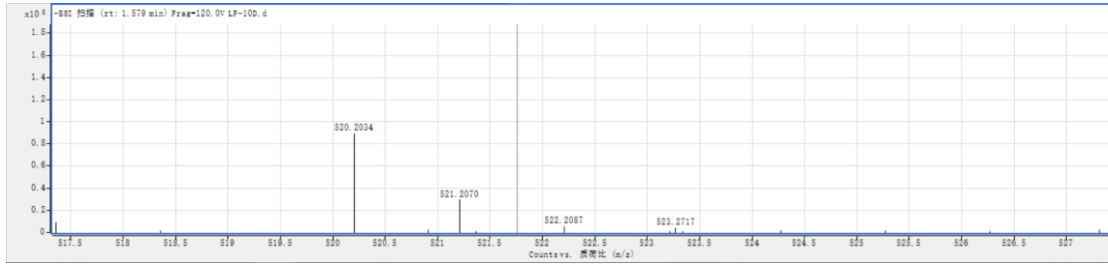

## HRMS (ESI) of intermediate 10c

### 谱图报告

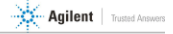

|           |          |          |                               |              |                                             |
|-----------|----------|----------|-------------------------------|--------------|---------------------------------------------|
| 名称        | Sample35 | 样品架位置    | 仪器                            | Instrument 1 | 操作者                                         |
| 进样体积 (ul) | 5        | 样品盘位置    | IRM 状态                        | 所有丢失的离子      |                                             |
| 数据文件      | LF=10G.d | 方法 (Acq) | 80meoh20water=10min-<br>neg.m | 注释           | 采集时间 (本地) 2023/5/18 16:43:56<br>(UTC+08:00) |

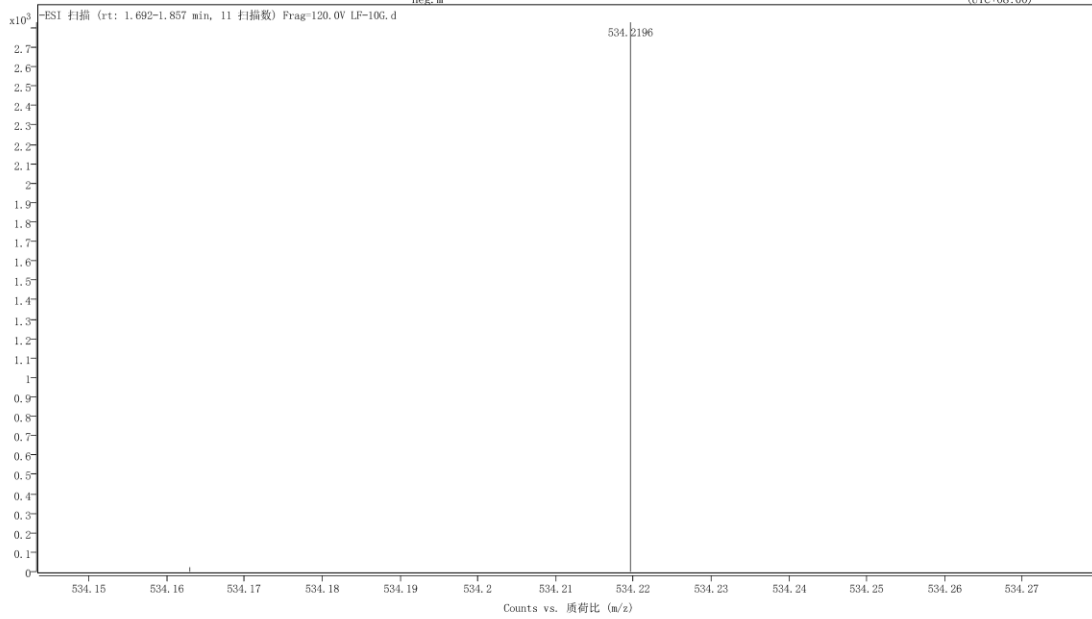

### <sup>1</sup>H-NMR of intermediate **10d**

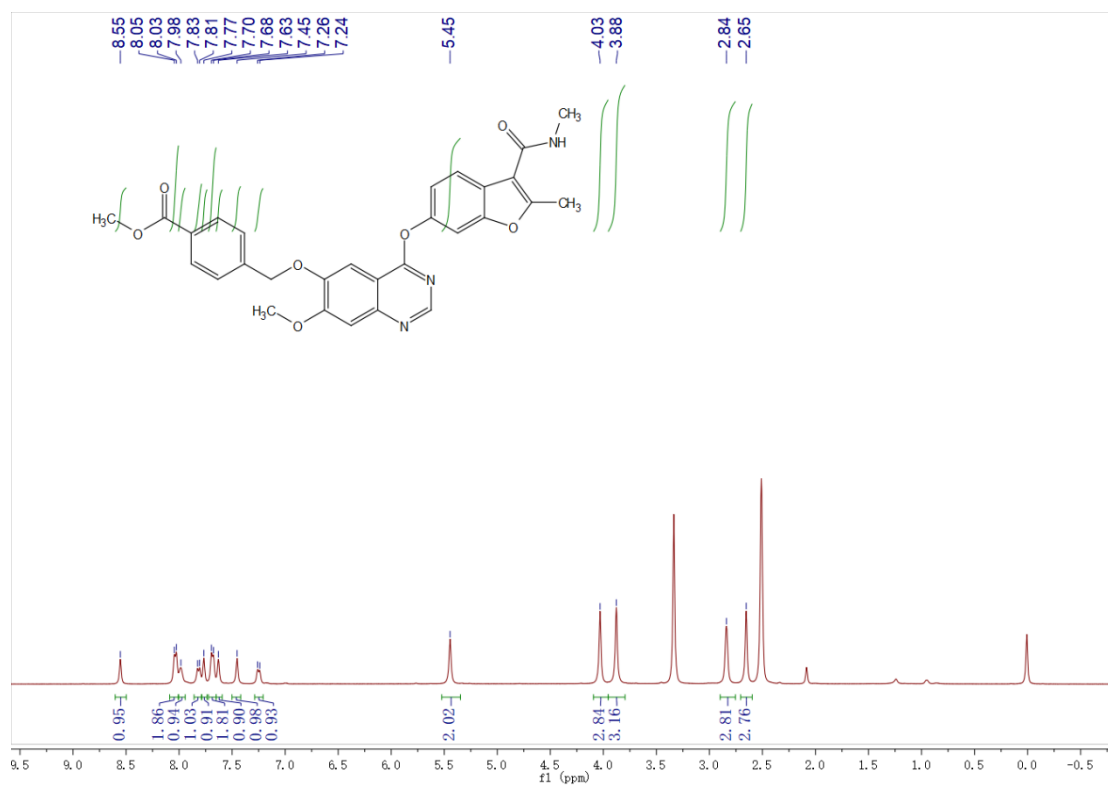

### <sup>1</sup>H-NMR of intermediate **10e**

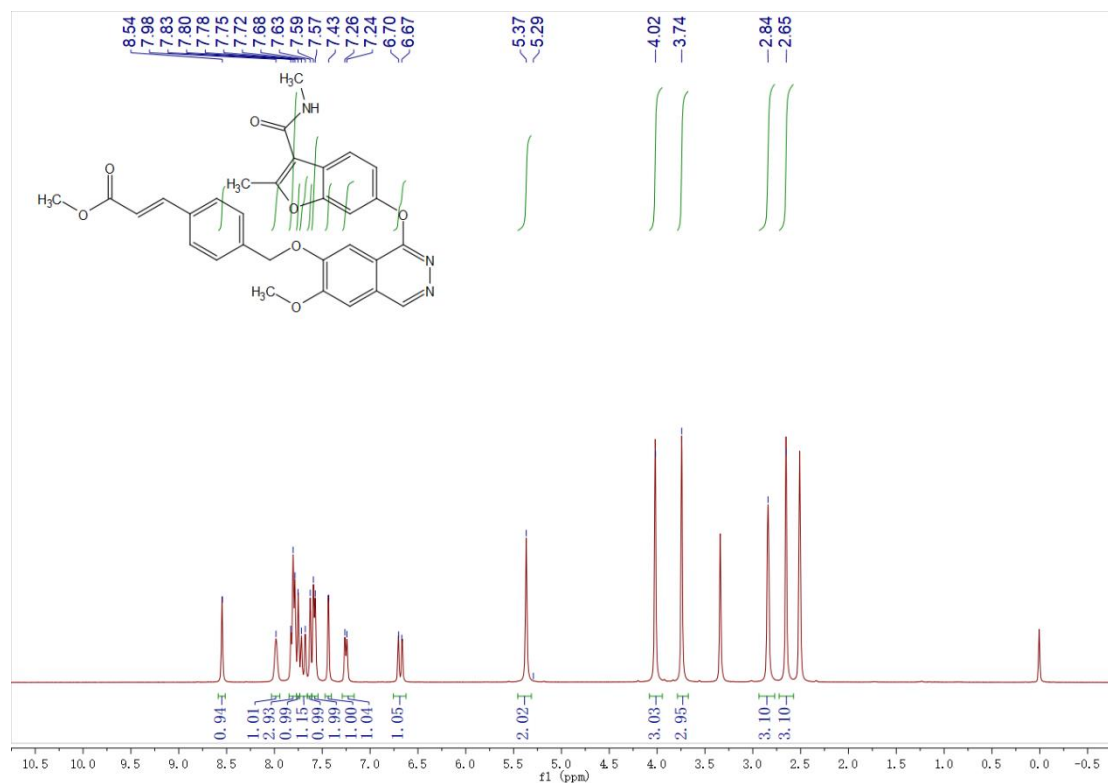



# HRMS (ESI) of intermediate 10f

## 谱图报告

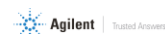

|           |          |          |                               |              |                                             |
|-----------|----------|----------|-------------------------------|--------------|---------------------------------------------|
| 名称        | Sample30 | 样品架位置    | 仪器                            | Instrument 1 | 操作者                                         |
| 进样体积 (ul) | 5        | 样品盘位置    | IRM 状态                        | 所有丢失的离子      |                                             |
| 数据文件      | LF-10B.d | 方法 (Acq) | 80mech20water-10min-<br>neg.m | 注释           | 采集时间 (本地) 2023/5/18 15:50:55<br>(UTC+08:00) |

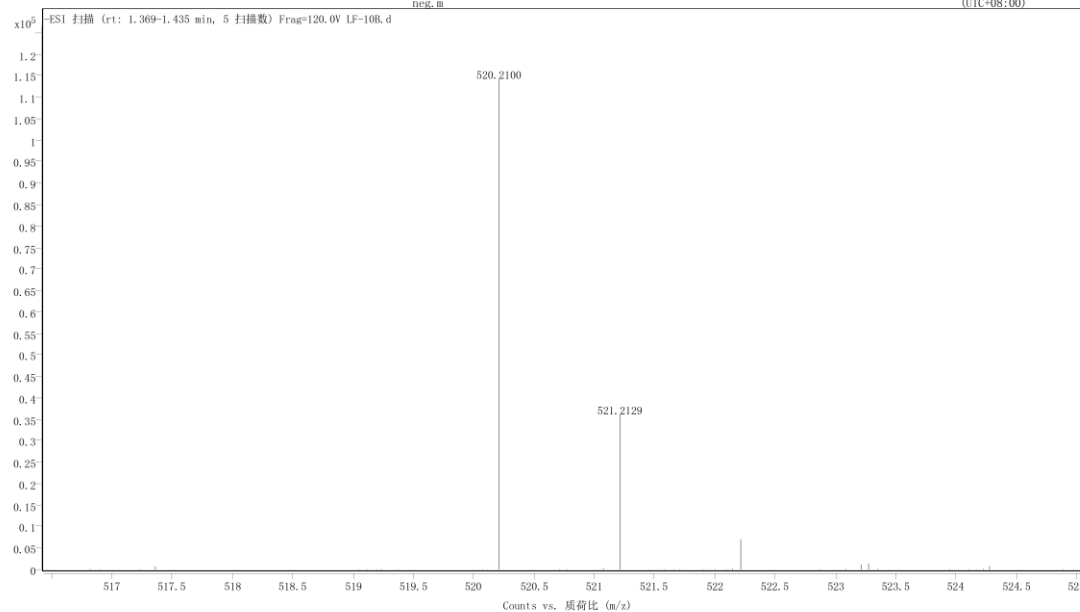

# HRMS (ESI) of intermediate 10g

## 谱图报告

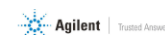

|           |          |          |                               |              |                                             |
|-----------|----------|----------|-------------------------------|--------------|---------------------------------------------|
| 名称        | Sample33 | 样品架位置    | 仪器                            | Instrument 1 | 操作者                                         |
| 进样体积 (ul) | 5        | 样品盘位置    | IRM 状态                        | 所有丢失的离子      |                                             |
| 数据文件      | LF-10E.d | 方法 (Acq) | 80mech20water-10min-<br>neg.m | 注释           | 采集时间 (本地) 2023/5/18 16:22:44<br>(UTC+08:00) |

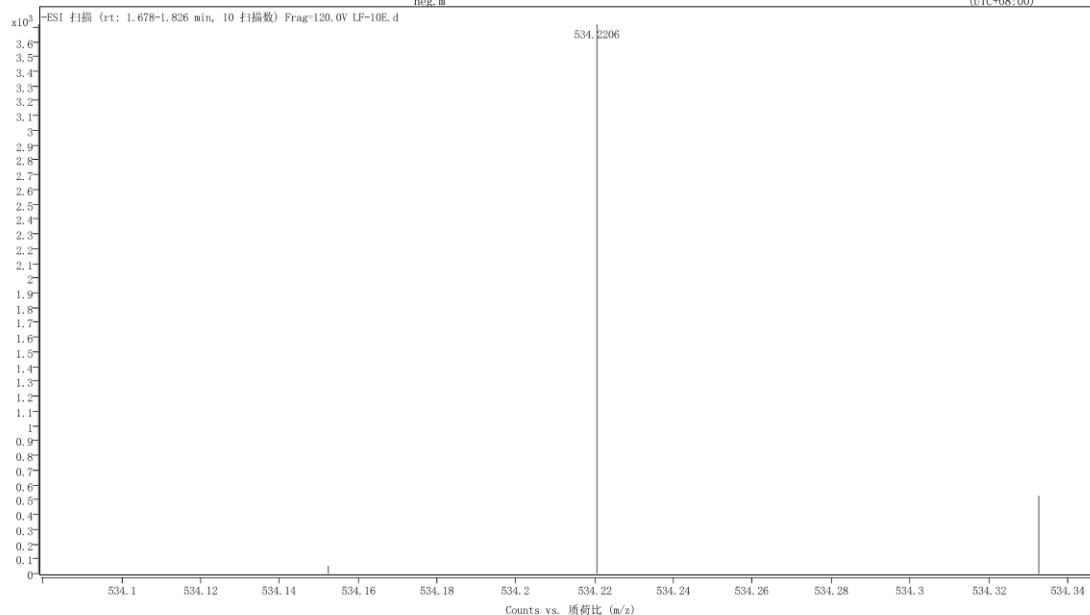

# HRMS (ESI) of intermediate 10h

## 谱图报告

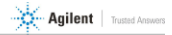

|           |          |          |                               |              |                                             |
|-----------|----------|----------|-------------------------------|--------------|---------------------------------------------|
| 名称        | Sample36 | 样品架位置    | 仪器                            | Instrument 1 | 操作者                                         |
| 进样体积 (ul) | 5        | 样品盘位置    | IRM 状态                        | 所有丢失的离子      |                                             |
| 数据文件      | LF-10H.d | 方法 (Acq) | 80mech20water-10min-<br>neg.m | 注释           | 采集时间 (本地) 2023/5/18 16:54:32<br>(UTC+08:00) |

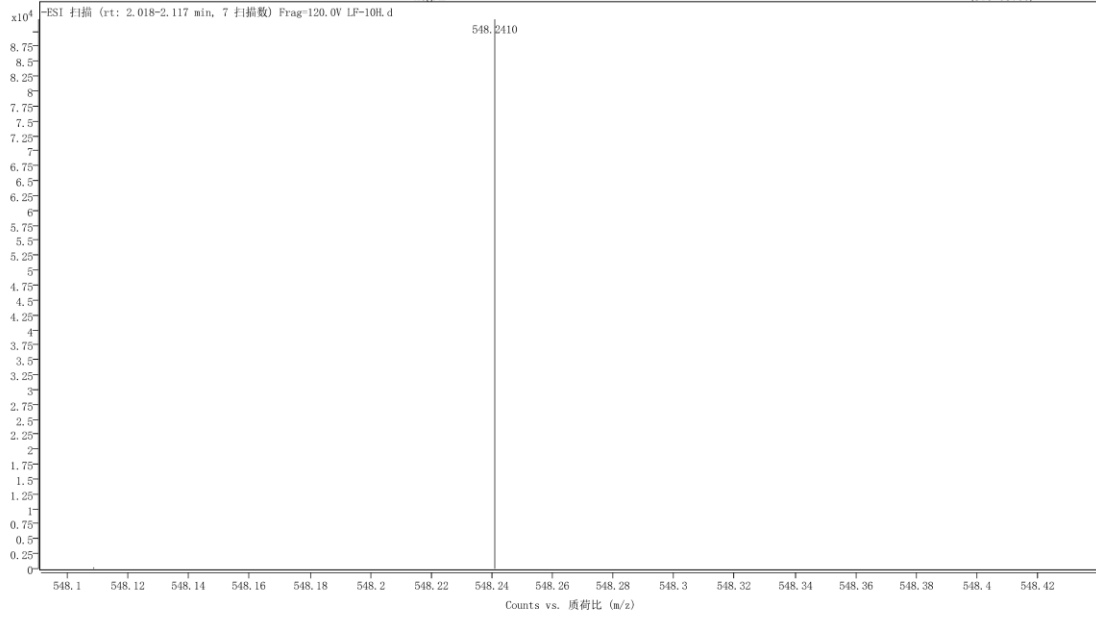

# HRMS (ESI) of intermediate 10j

## 谱图报告

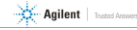

|           |          |          |                               |              |                                             |
|-----------|----------|----------|-------------------------------|--------------|---------------------------------------------|
| 名称        | Sample39 | 样品架位置    | 仪器                            | Instrument 1 | 操作者                                         |
| 进样体积 (ul) | 5        | 样品盘位置    | IRM 状态                        | 所有丢失的离子      |                                             |
| 数据文件      | LF-10K.d | 方法 (Acq) | 80mech20water-10min-<br>neg.m | 注释           | 采集时间 (本地) 2023/5/18 17:26:20<br>(UTC+08:00) |

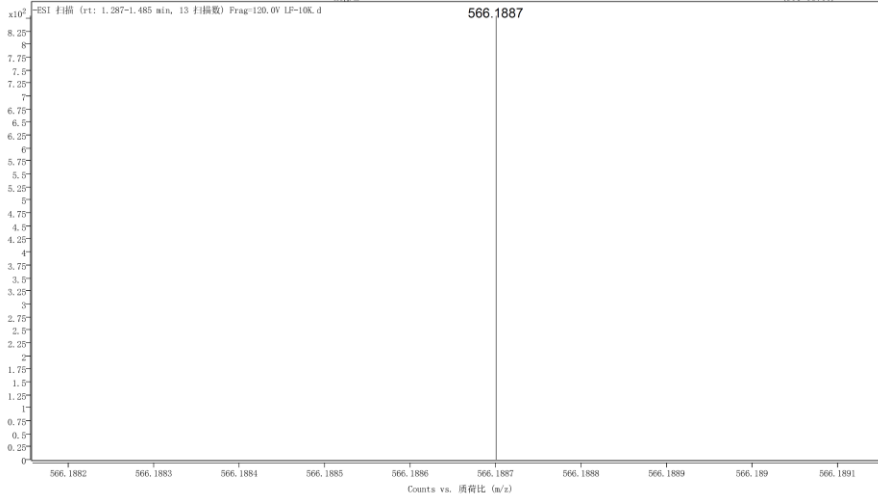

# HRMS (ESI) of intermediate 10k

## 谱图报告



|           |          |          |                           |              |                                          |
|-----------|----------|----------|---------------------------|--------------|------------------------------------------|
| 名称        | Sample31 | 样品架位置    | 仪器                        | Instrument 1 | 操作者                                      |
| 进样体积 (ul) | 5        | 样品盘位置    | IRM 状态                    | 所有丢失的离子      |                                          |
| 数据文件      | LF-10C.d | 方法 (Acq) | 80meoh20water-10min-neg.m | 注释           | 采集时间 (本地) 2023/5/18 16:01:32 (UTC+08:00) |

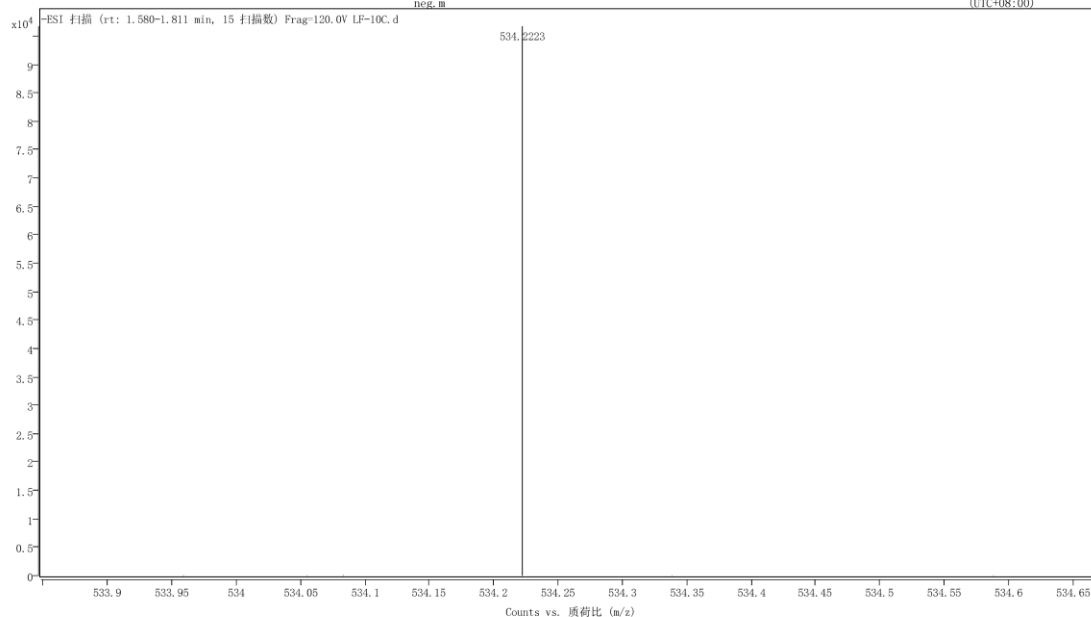

# HRMS (ESI) of intermediate 10l

## 谱图报告



|           |          |          |                           |              |                                          |
|-----------|----------|----------|---------------------------|--------------|------------------------------------------|
| 名称        | Sample34 | 样品架位置    | 仪器                        | Instrument 1 | 操作者                                      |
| 进样体积 (ul) | 5        | 样品盘位置    | IRM 状态                    | 所有丢失的离子      |                                          |
| 数据文件      | LF-10F.d | 方法 (Acq) | 80meoh20water-10min-neg.m | 注释           | 采集时间 (本地) 2023/5/18 16:33:20 (UTC+08:00) |

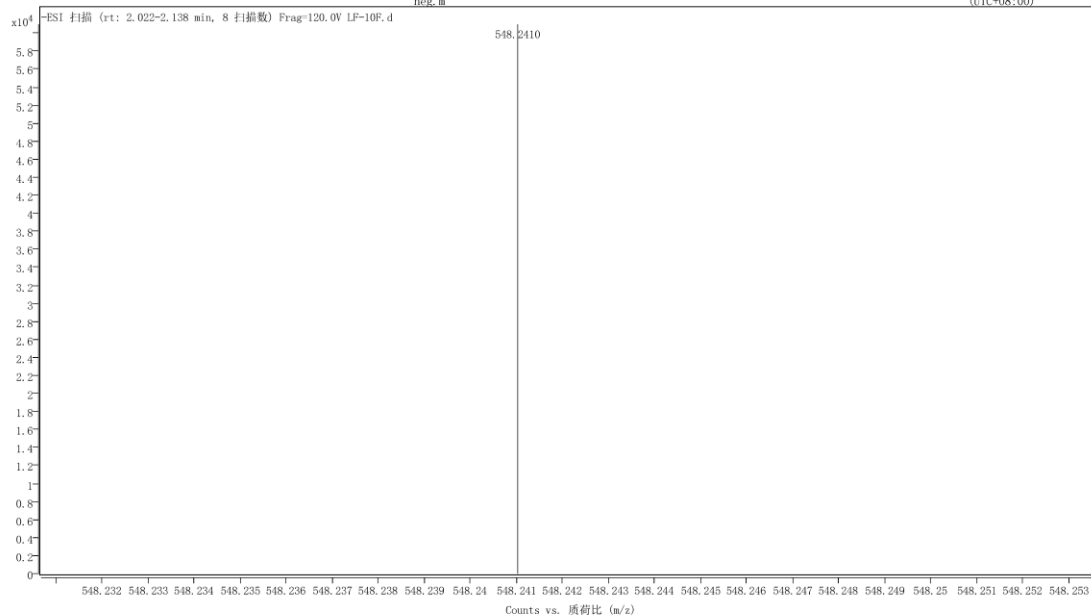

# HRMS (ESI) of intermediate 10m

## 谱图报告

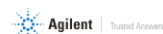

|           |          |          |                          |              |                                          |
|-----------|----------|----------|--------------------------|--------------|------------------------------------------|
| 名称        | Sample37 | 样品架位置    | 仪器                       | Instrument 1 | 操作者                                      |
| 进样体积 (ul) | 5        | 样品盘位置    | IRM 状态                   | 所有丢失的离子      |                                          |
| 数据文件      | LF-101.d | 方法 (Acq) | 80vol20water-10min-neg.m | 注释           | 采集时间 (本地) 2023/5/18 17:05:08 (UTC+08:00) |

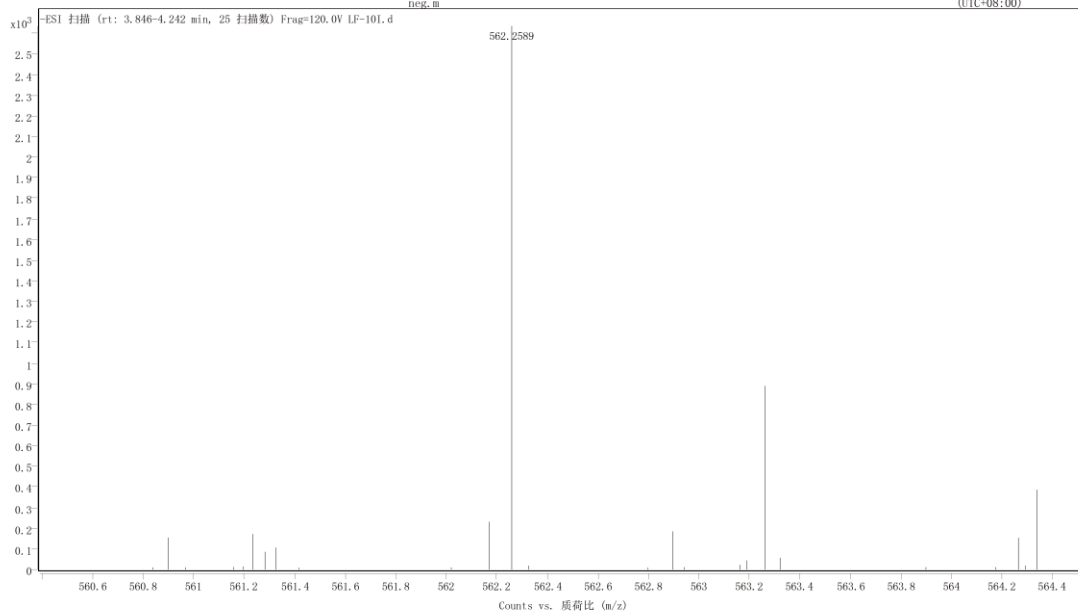

# <sup>1</sup>H-NMR of compound 12

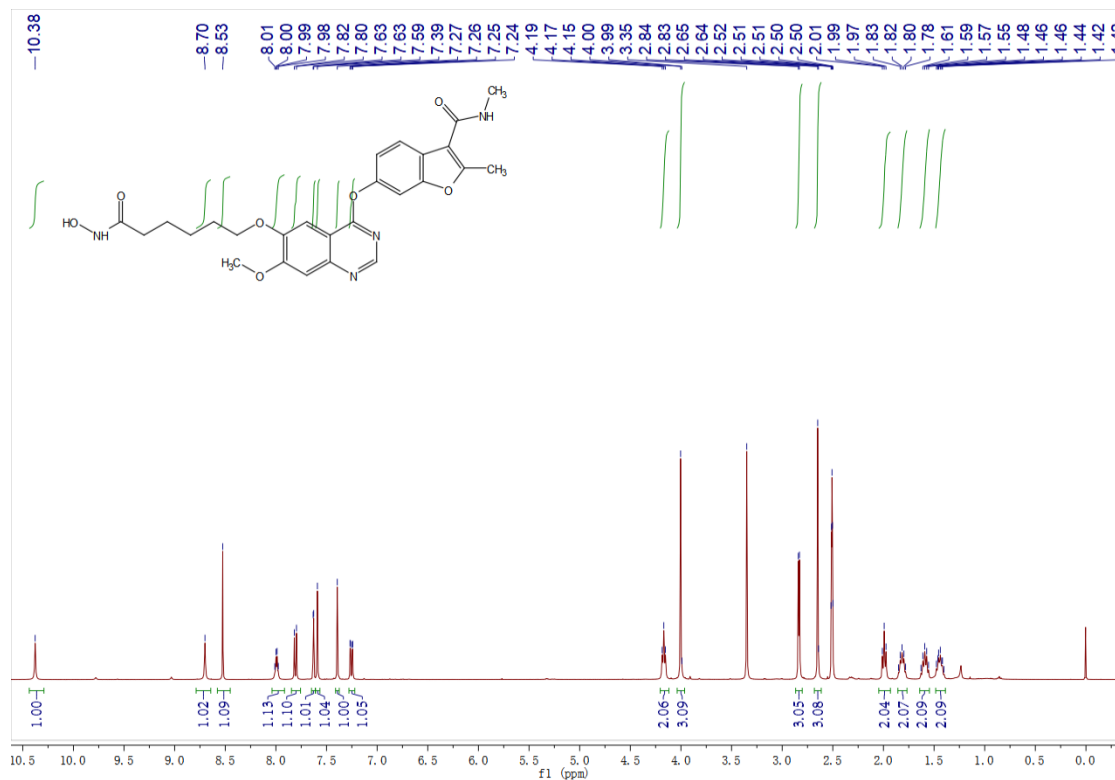

### <sup>13</sup>C-NMR of compound 12

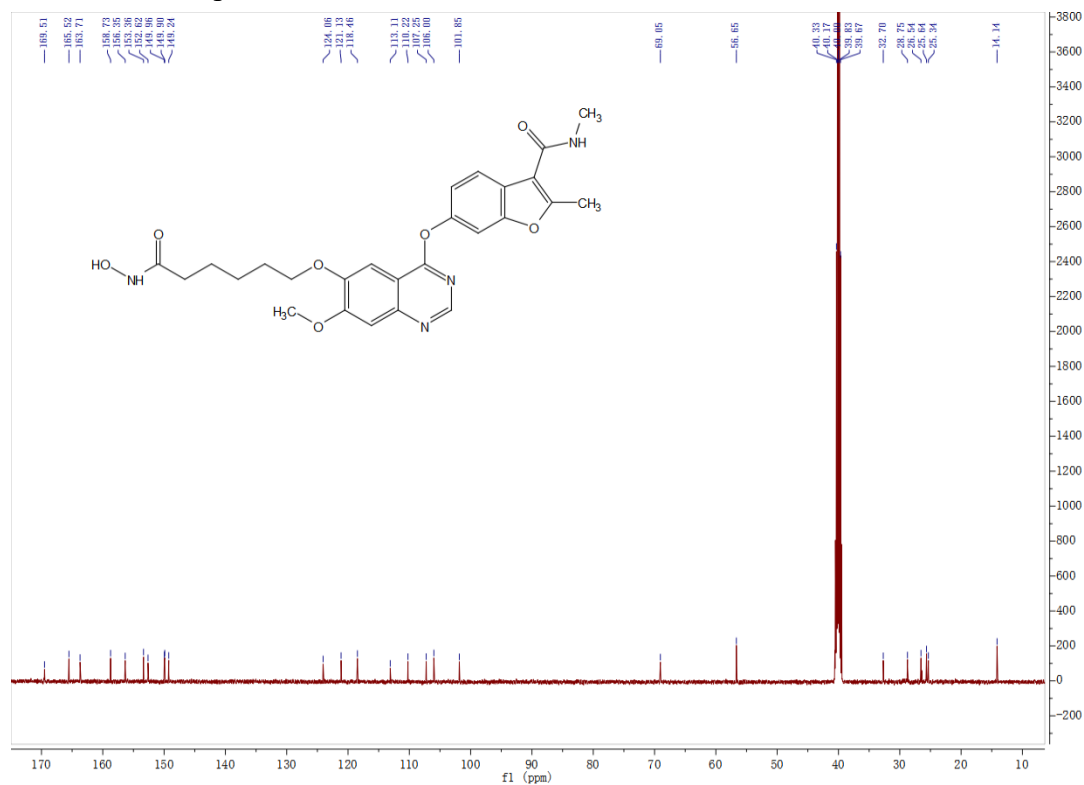

### HPLC of compound 13

2023/9/14 17:54

色谱图 G:\liuhan\NX160-3.prm

第1页/共6页

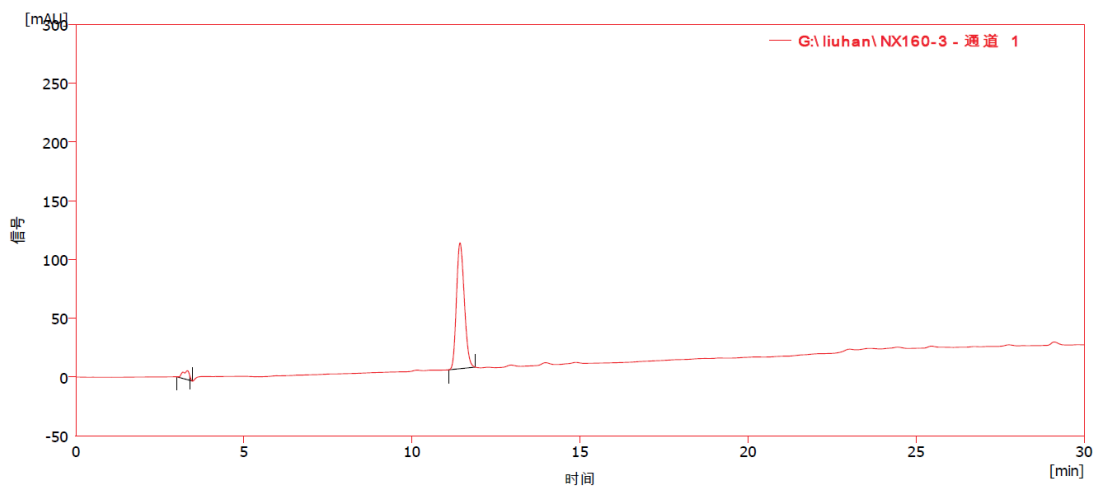

结果表(不计算 - G:\liuhan\NX160-3 - 通道 1)

|    | 保留时间 [min] | 峰面积 [mAU.s] | 峰高 [mAU] | 面积 [%] | 峰高 [%] | W05 [min] | PDA峰纯度 | 化合物名称 |
|----|------------|-------------|----------|--------|--------|-----------|--------|-------|
| 1  | 3.318      | 97.802      | 7.658    | 5.3    | 6.5    | 0.27      | 838    |       |
| 2  | 3.397      | 6.143       | 3.421    | 0.3    | 2.9    | 0.03      | 225    |       |
| 3  | 11.430     | 1739.623    | 107.067  | 94.4   | 90.6   | 0.26      | 927    |       |
| 合计 |            | 1843.569    | 118.145  | 100.0  | 100.0  |           |        |       |

### <sup>1</sup>H-NMR of compound 13

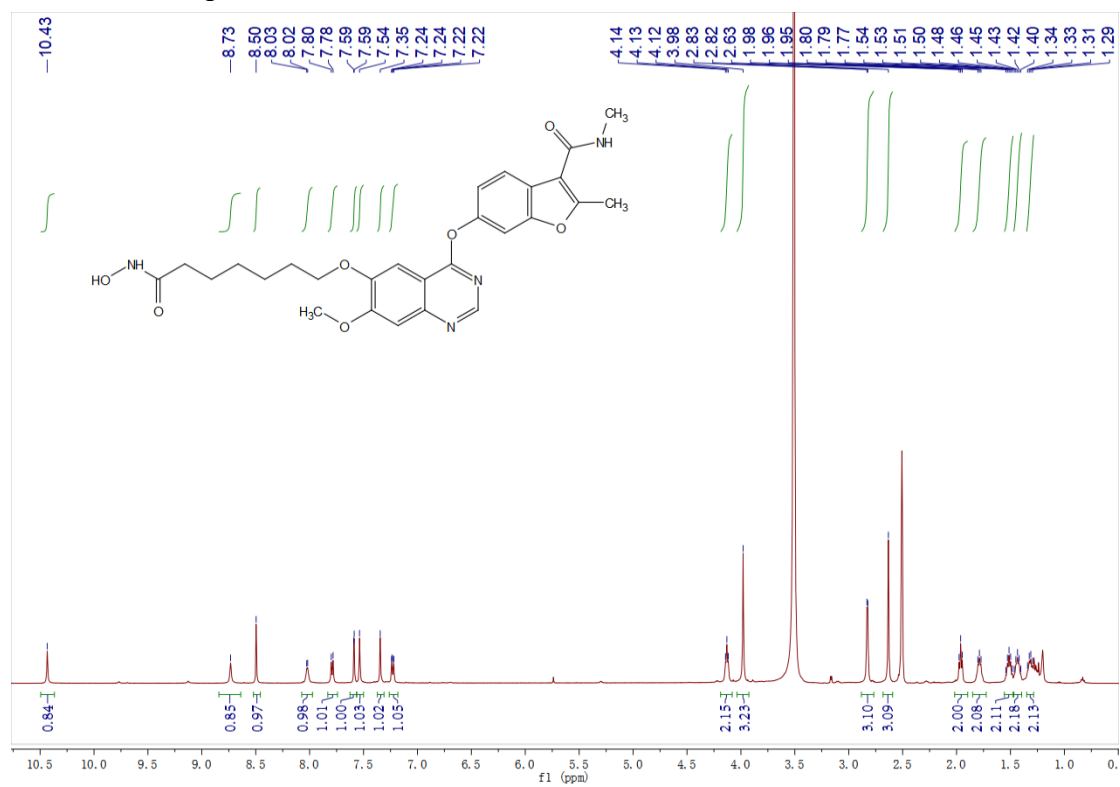

### <sup>13</sup>C-NMR of compound 13

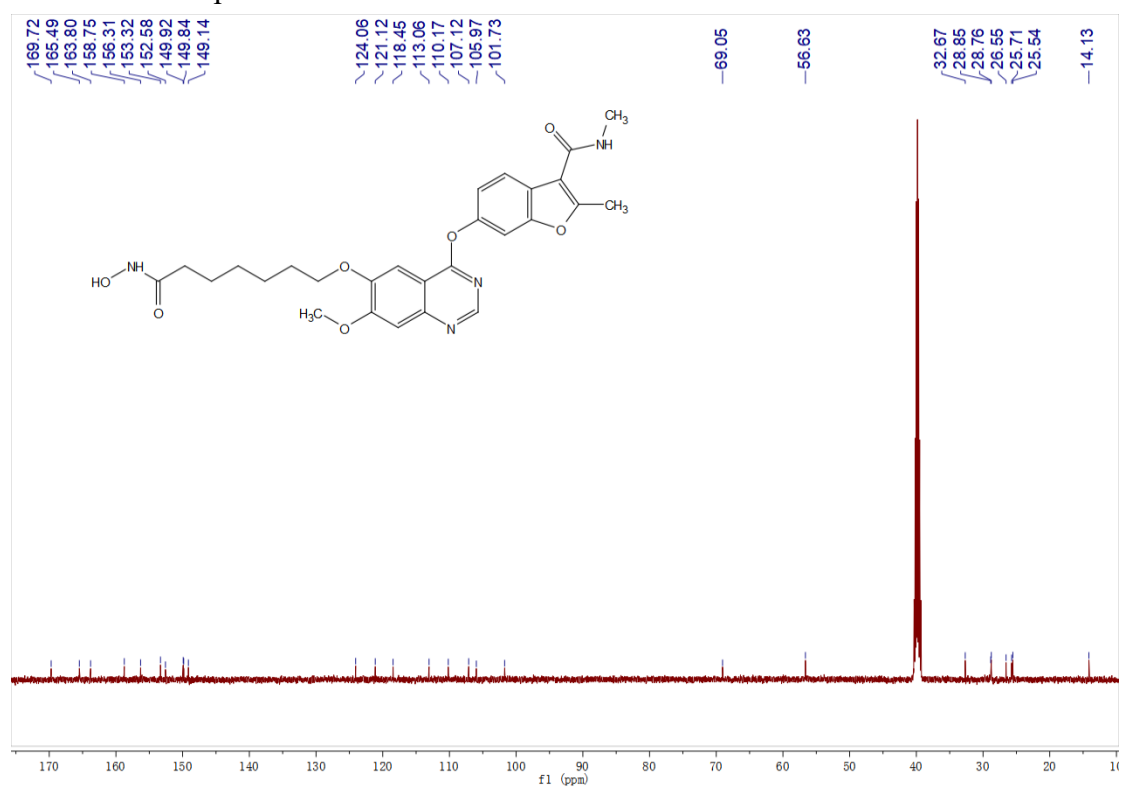

### <sup>1</sup>H-NMR of compound 14

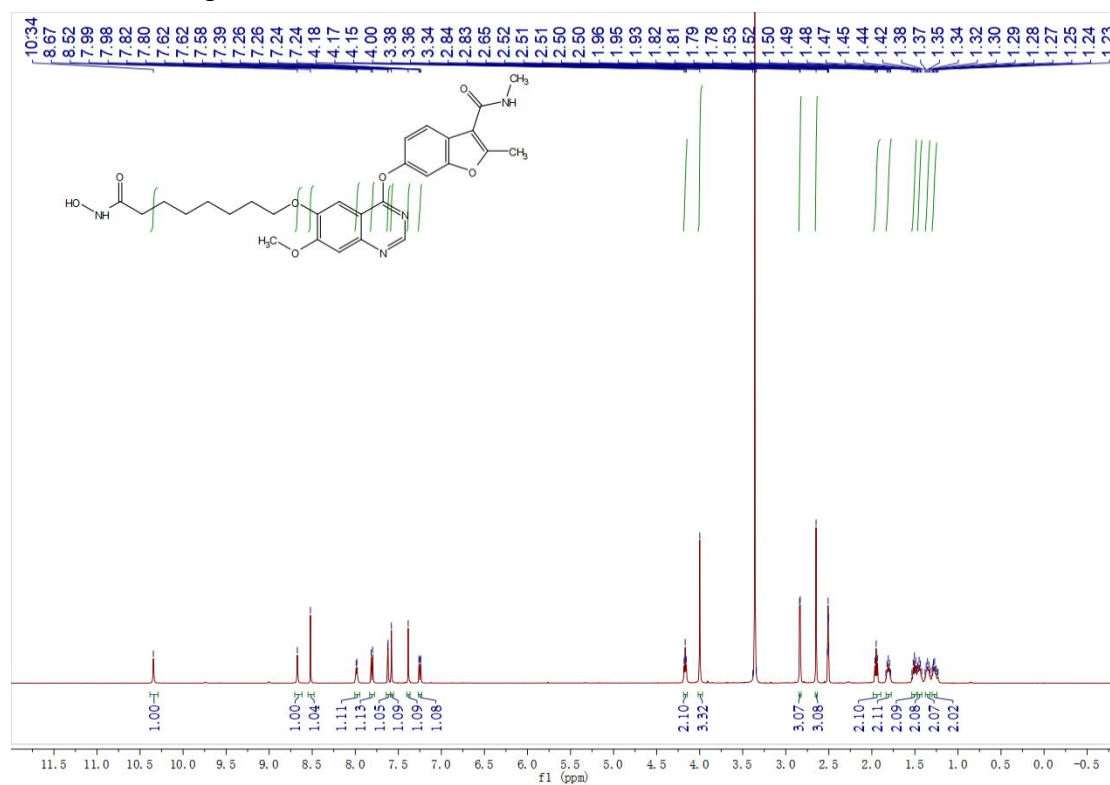

### <sup>13</sup>C-NMR of compound 14

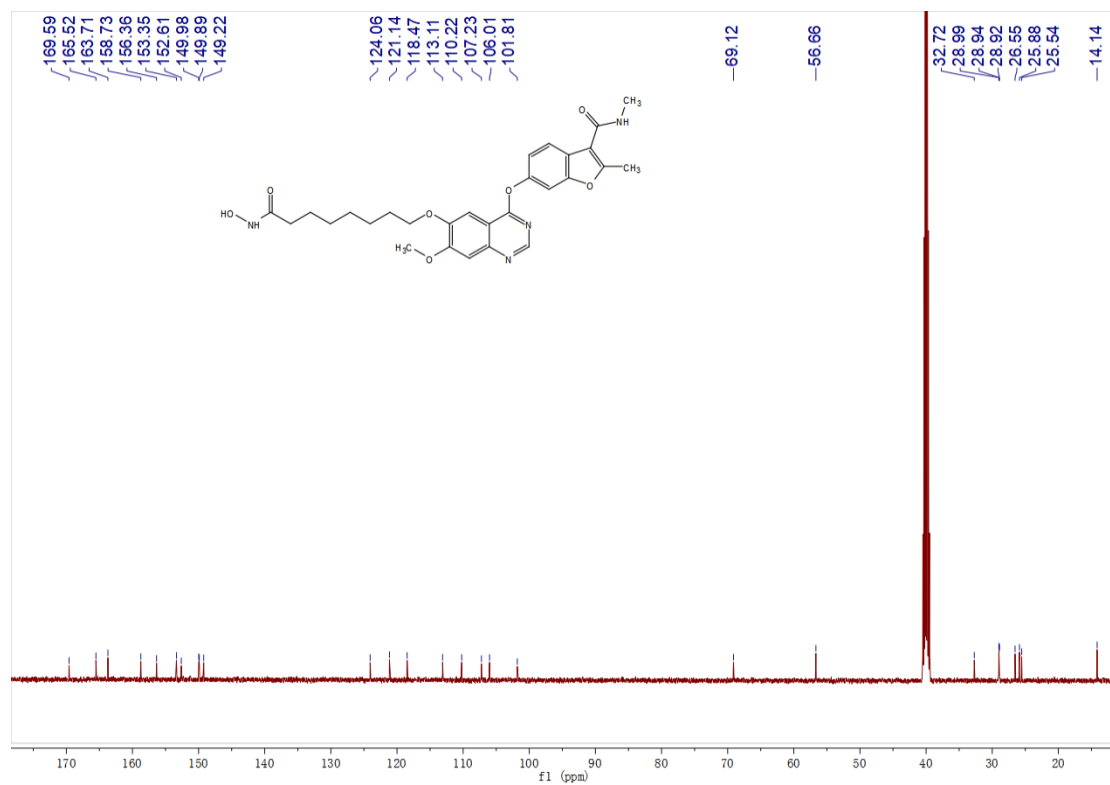

### <sup>1</sup>H-NMR of compound 15

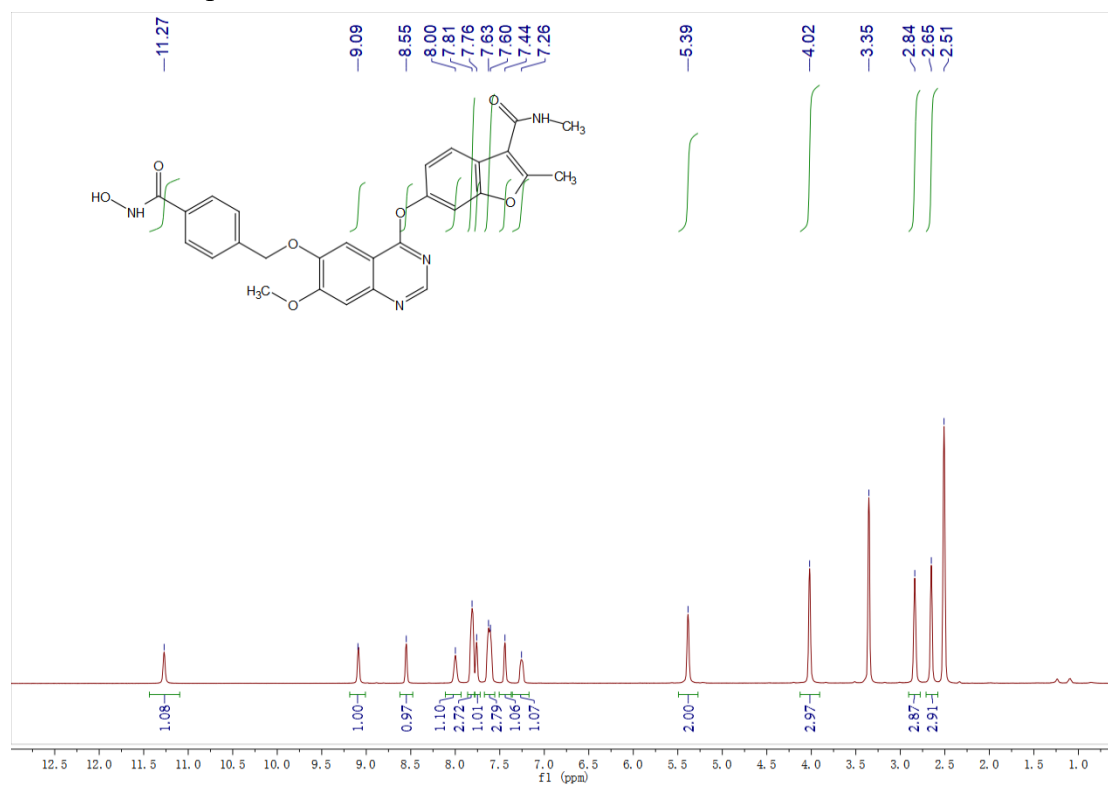

### <sup>13</sup>C-NMR of compound 15

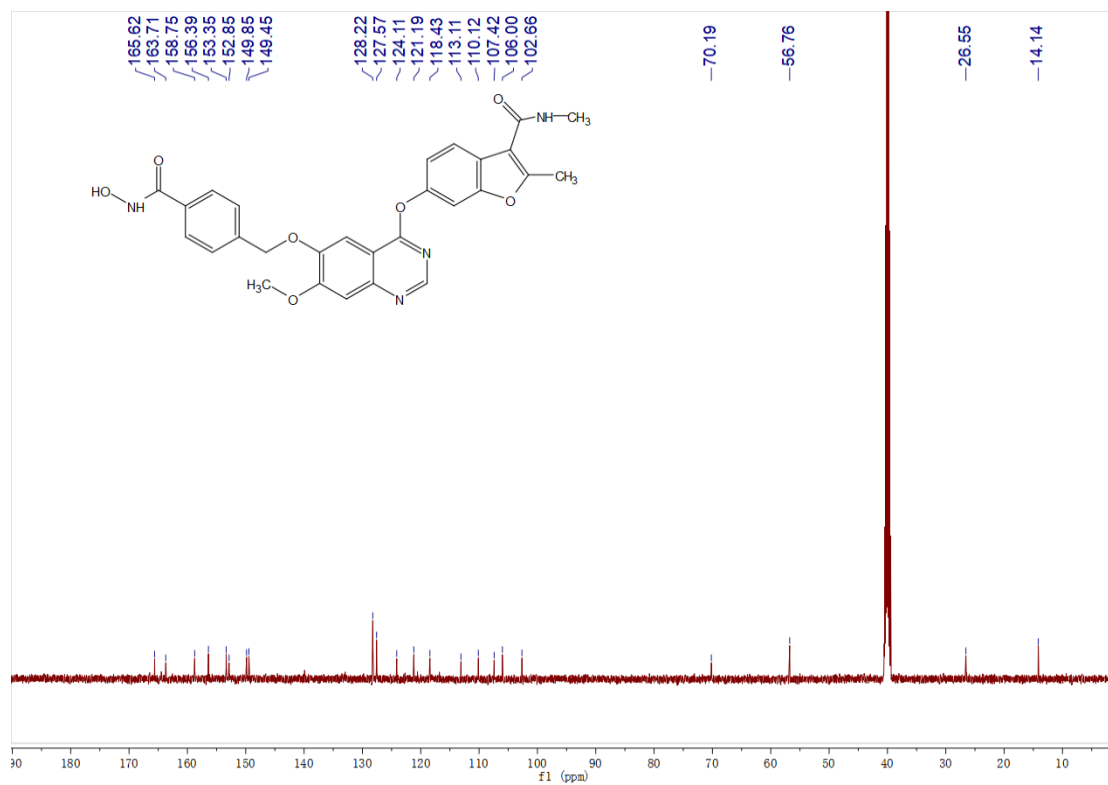



### <sup>1</sup>H-NMR of compound 16

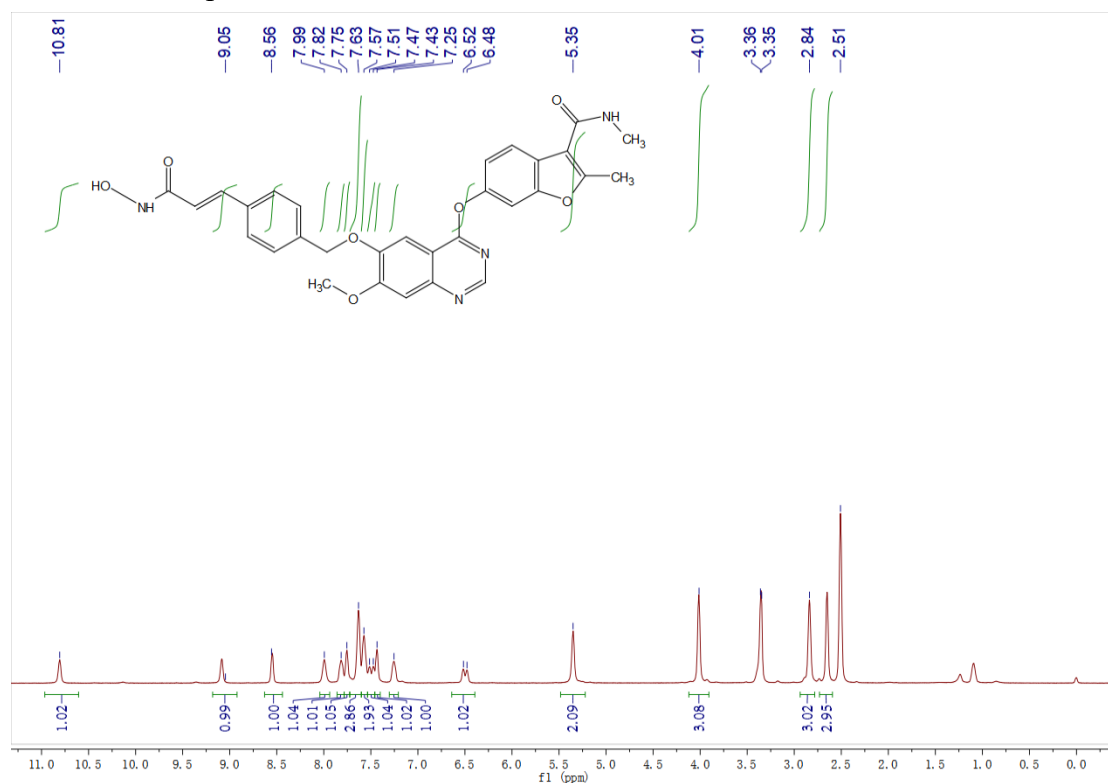

### <sup>13</sup>C-NMR of compound 16

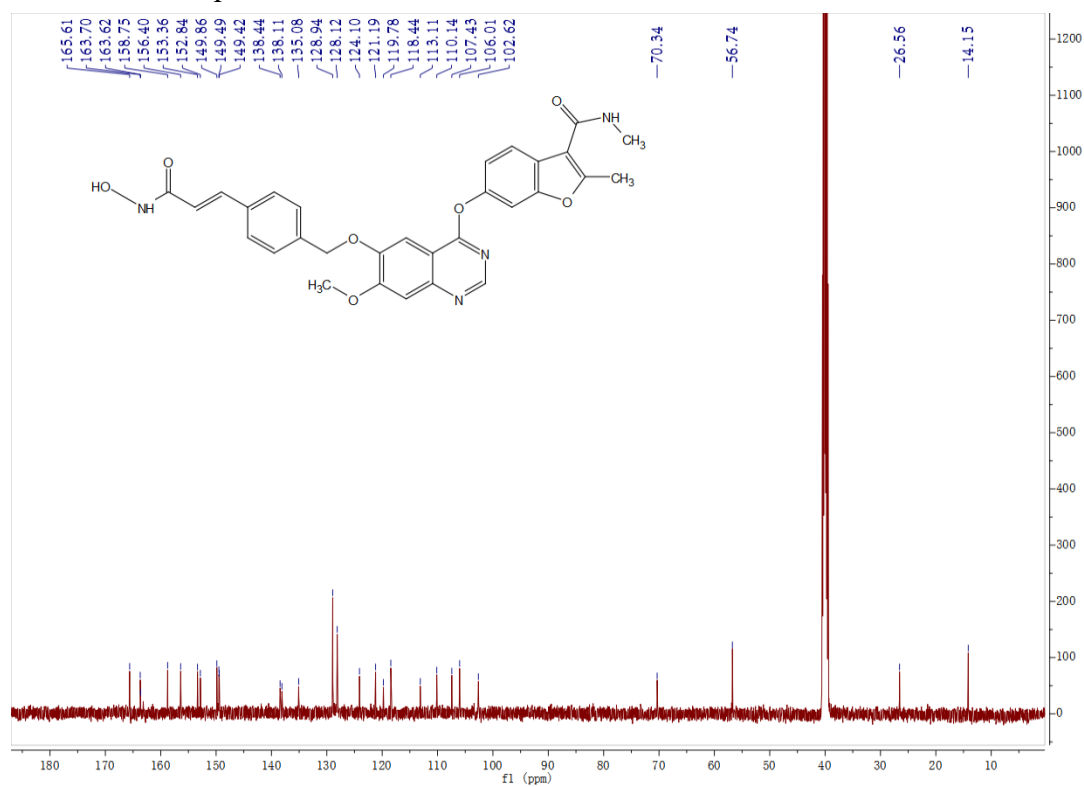

### <sup>1</sup>H-NMR of compound 17

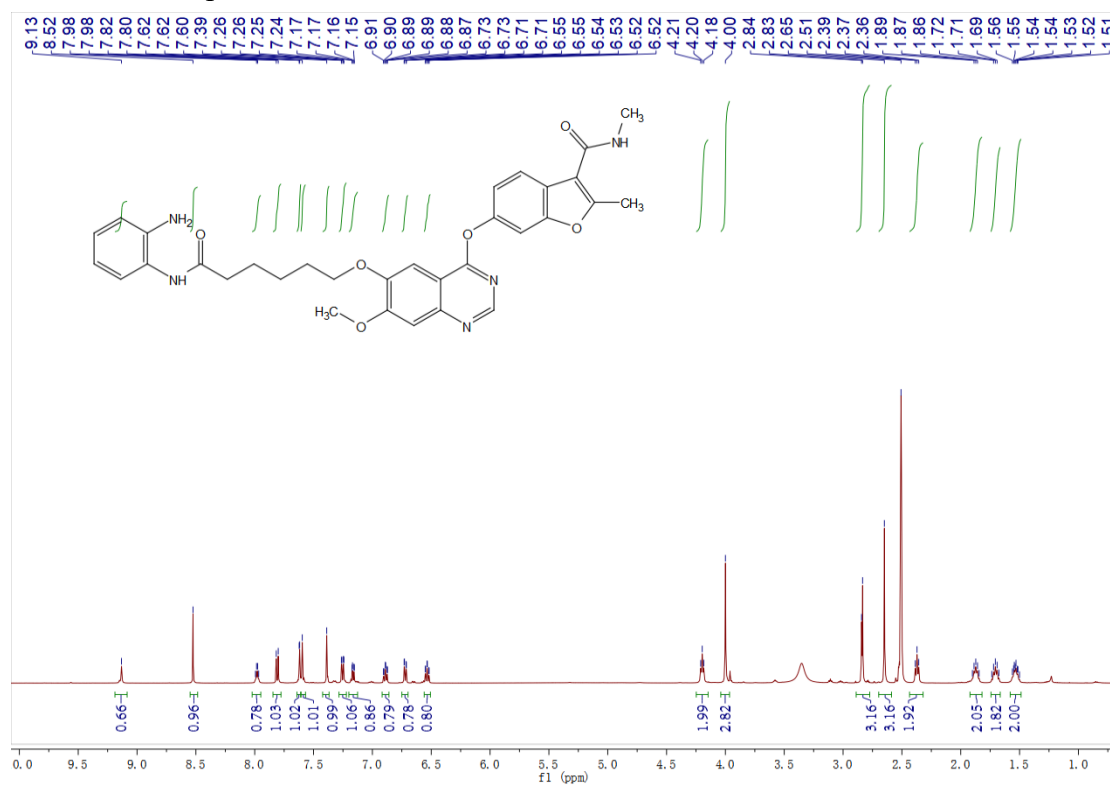

### <sup>13</sup>C-NMR of compound 17

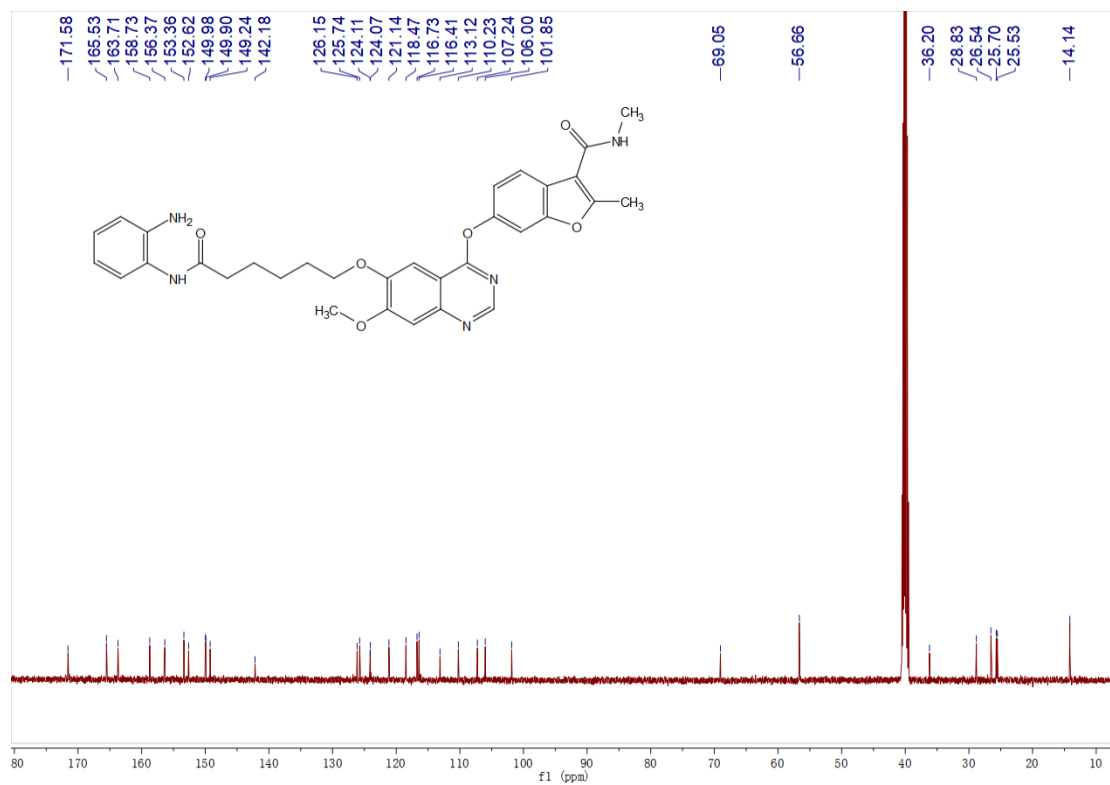

### <sup>1</sup>H-NMR of compound **18**

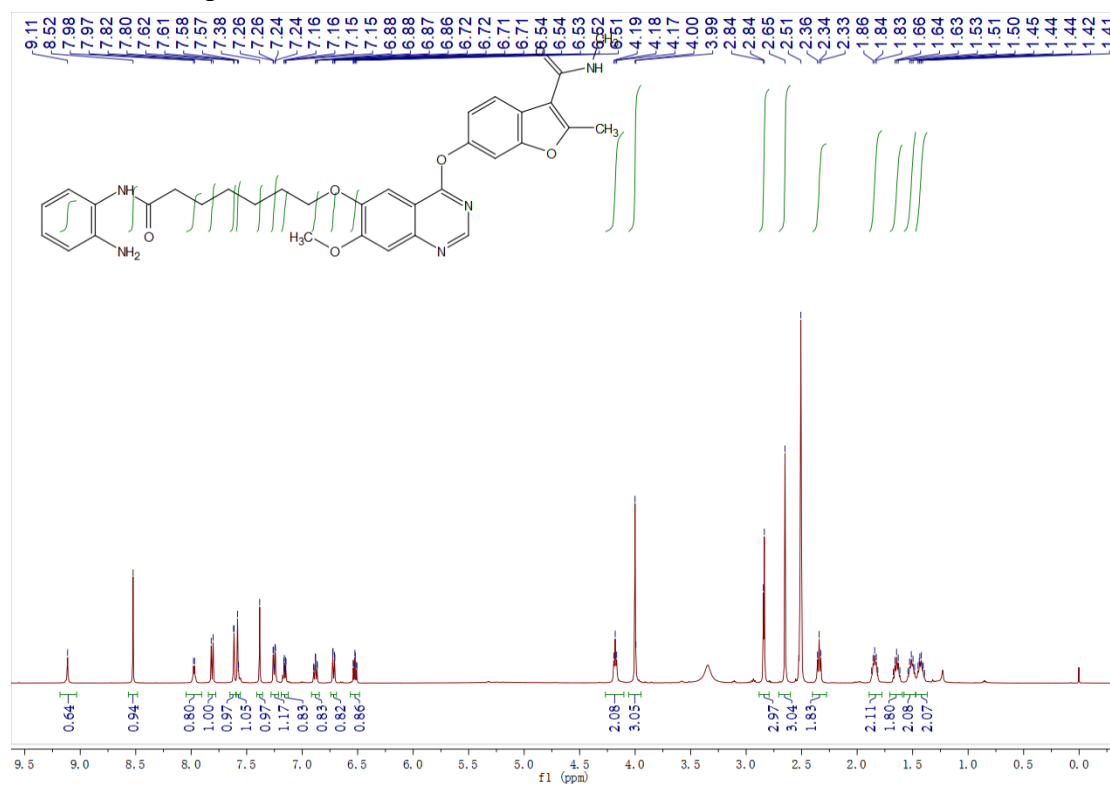

### <sup>13</sup>C-NMR of compound **18**

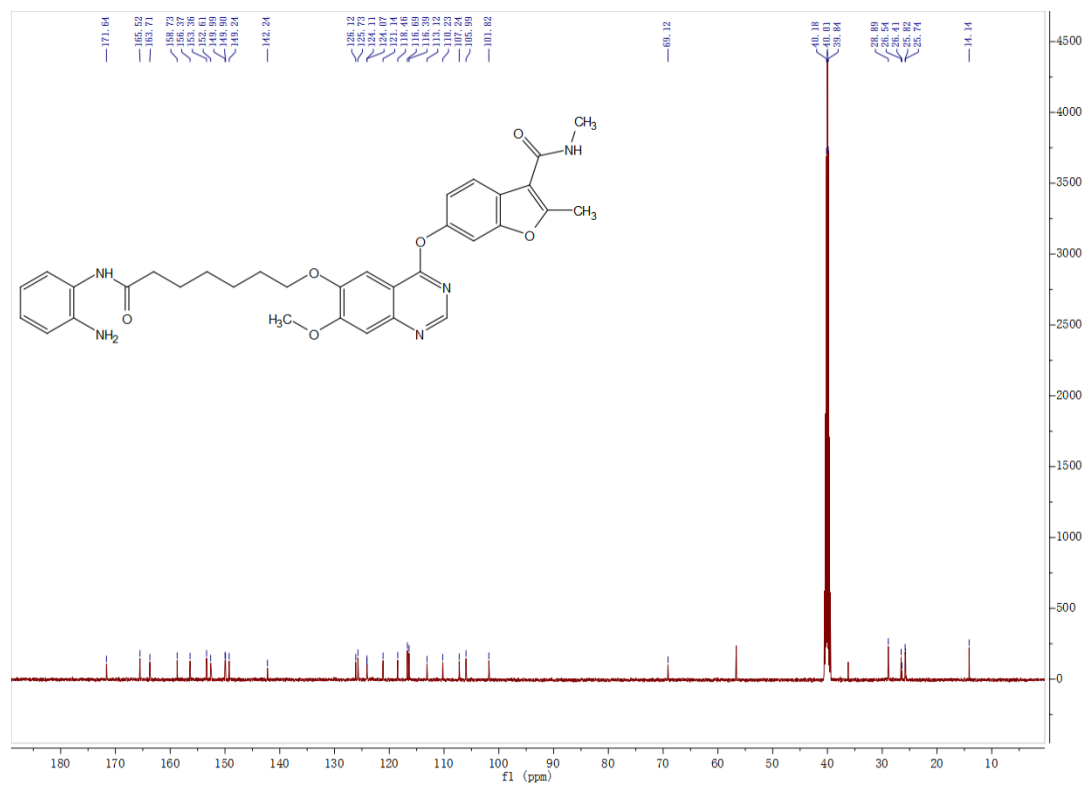

### <sup>1</sup>H-NMR of compound **19**

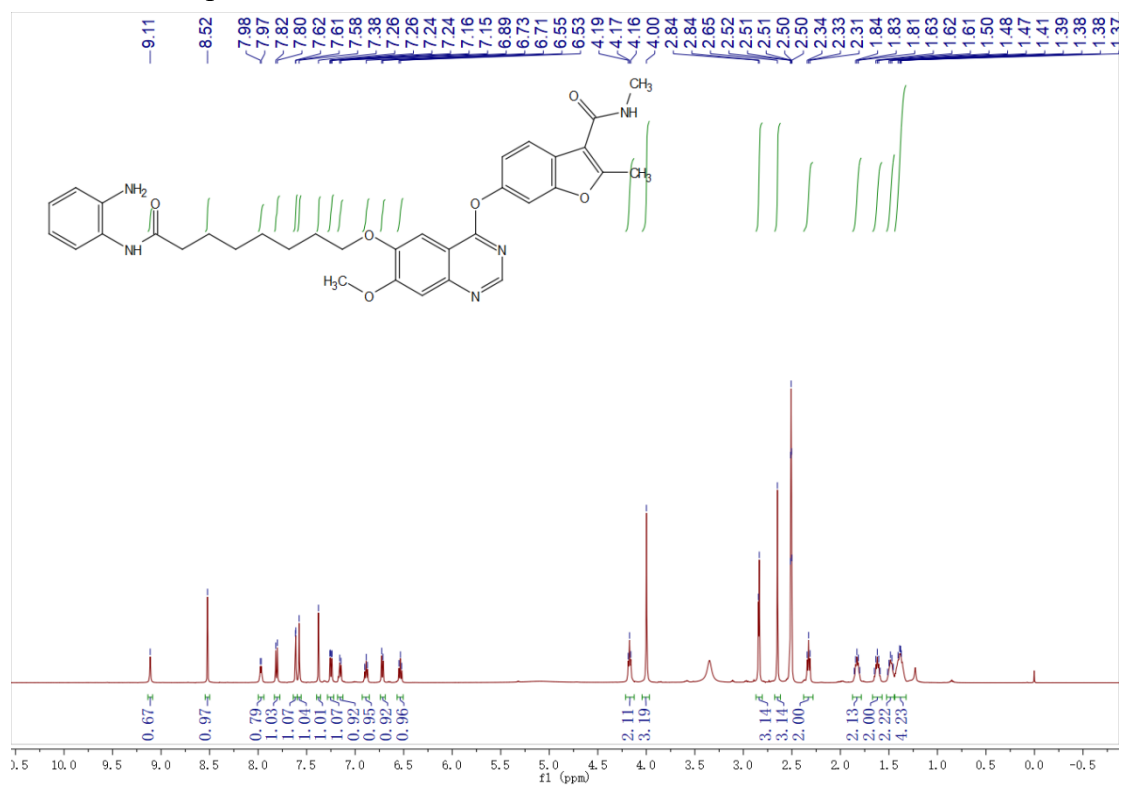

### <sup>13</sup>C-NMR of compound **19**

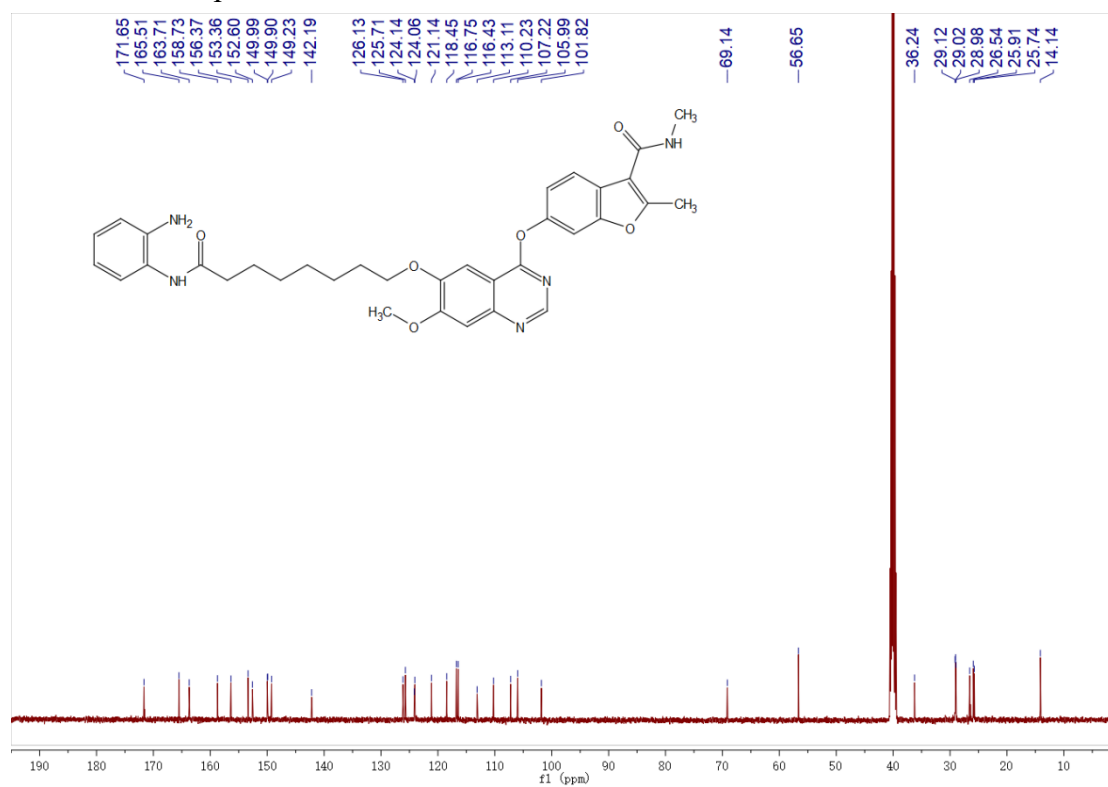

### <sup>1</sup>H-NMR of compound 20

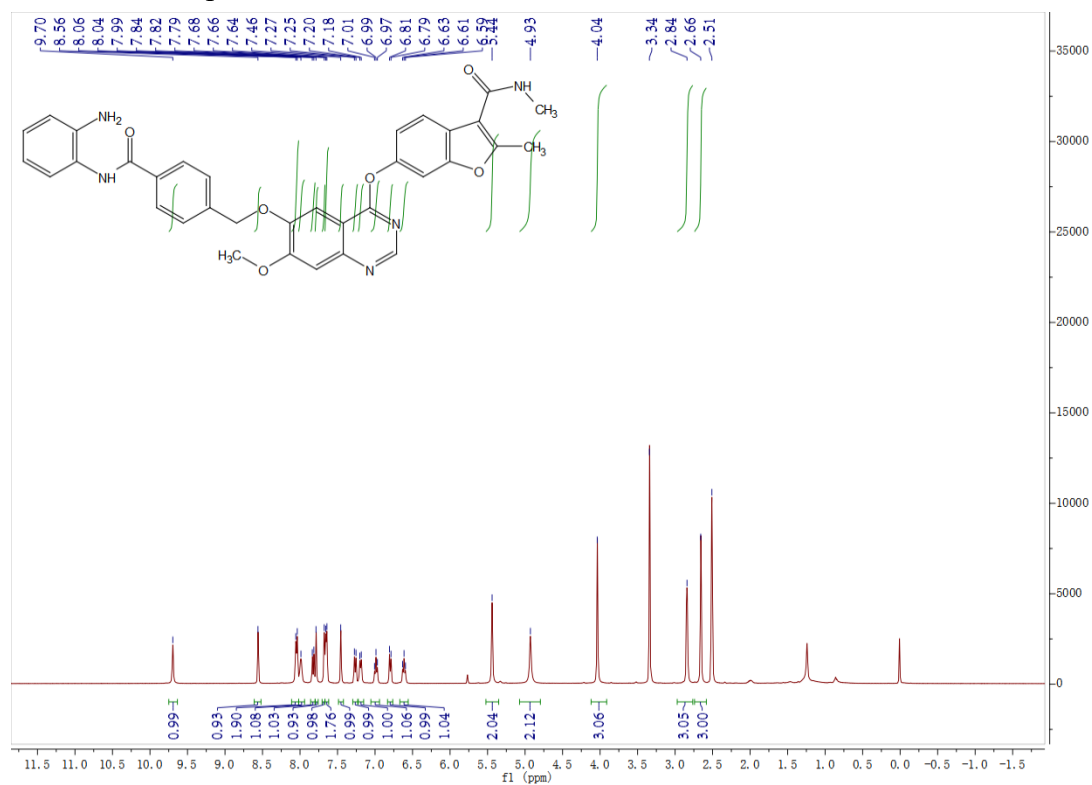

### <sup>13</sup>C-NMR of compound 20

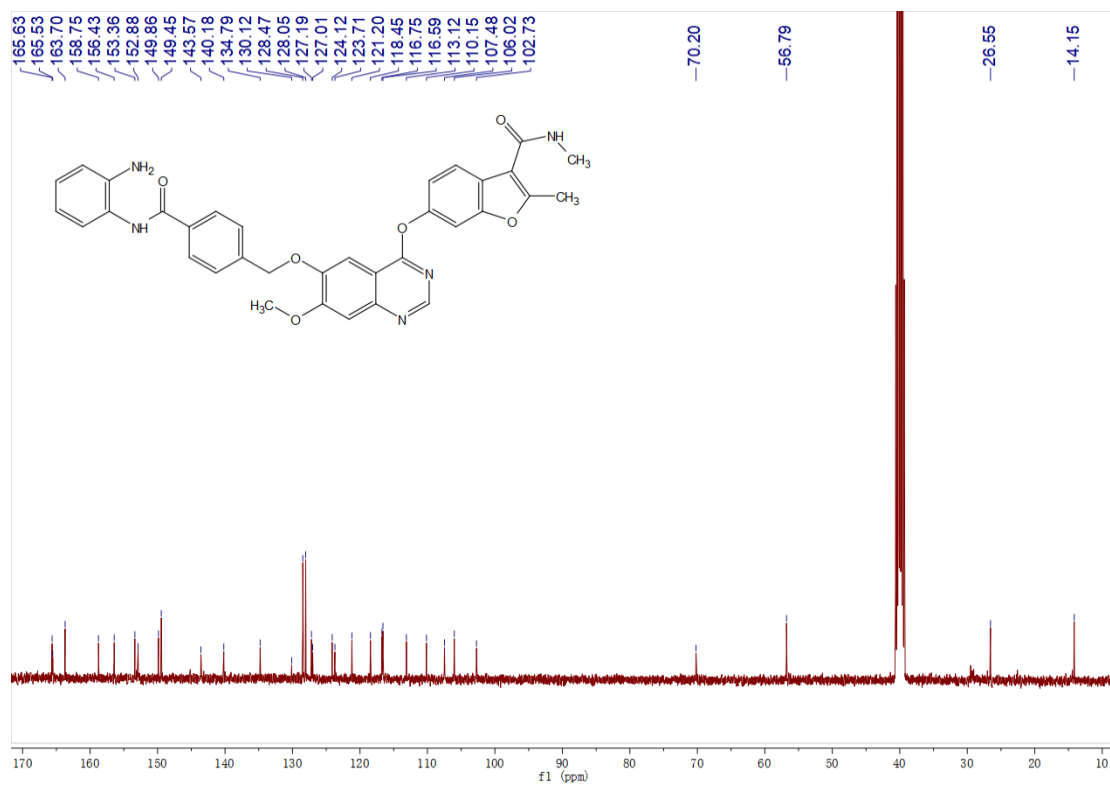

### <sup>1</sup>H-NMR of compound 21

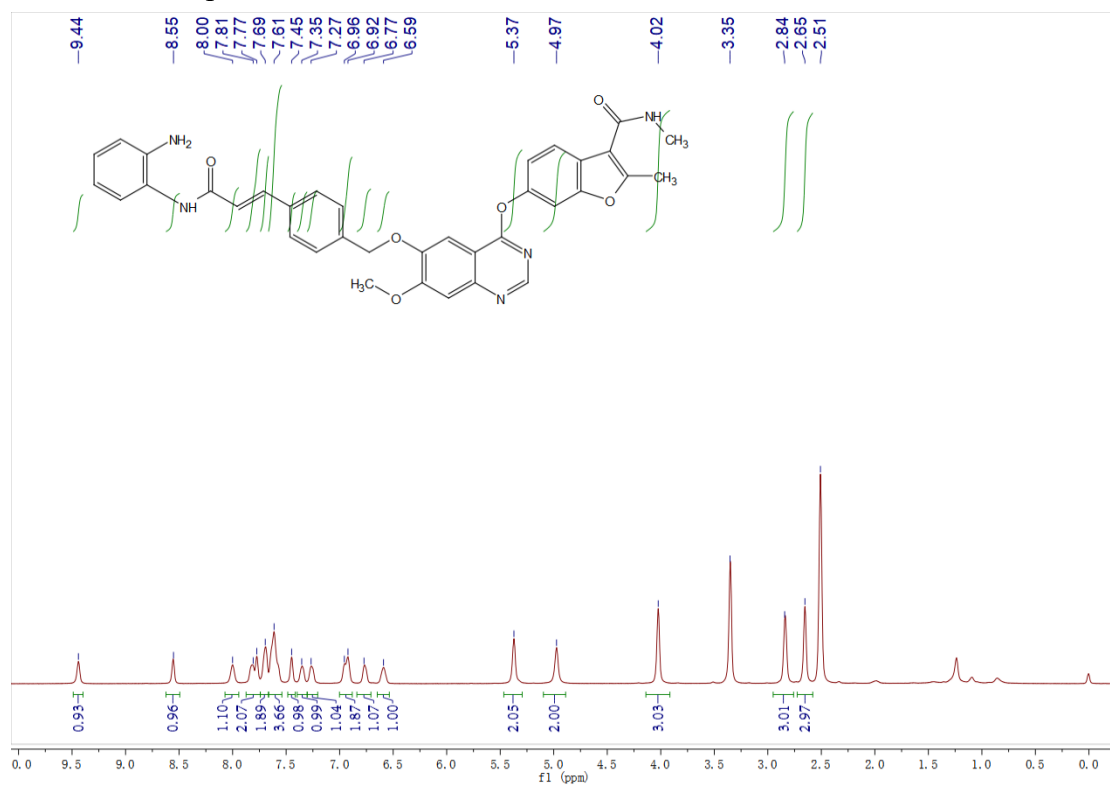

### <sup>13</sup>C-NMR of compound 21

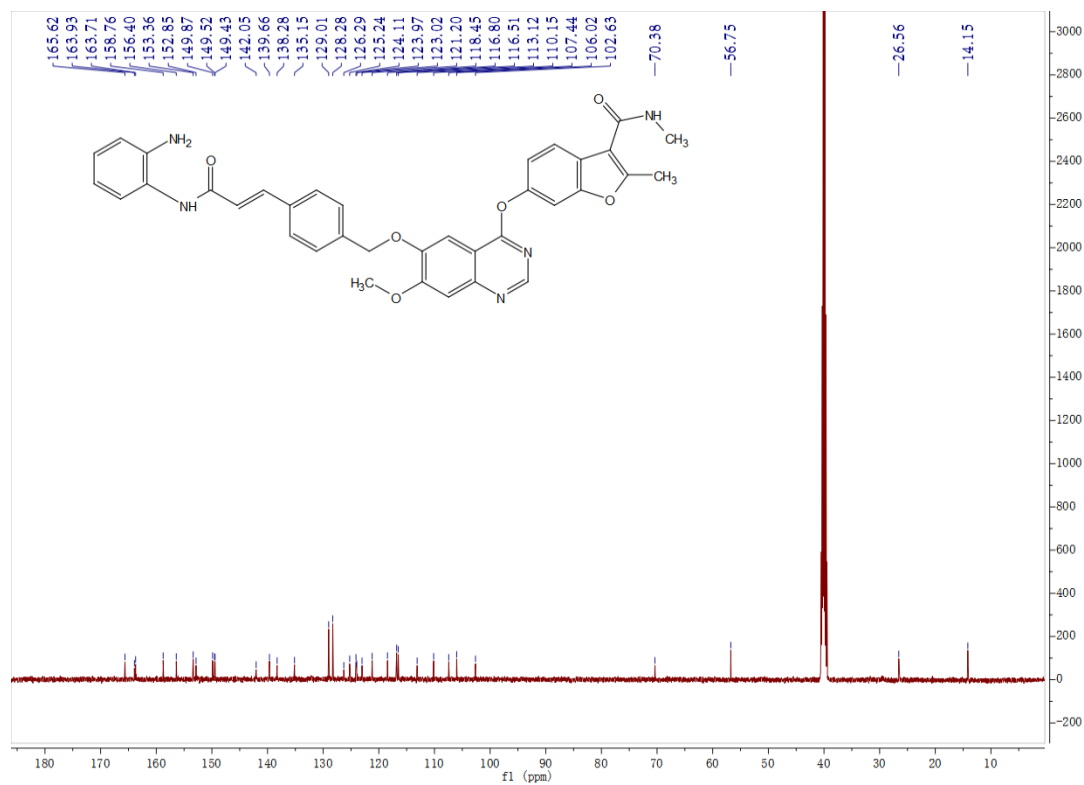

### <sup>1</sup>H-NMR of compound 22

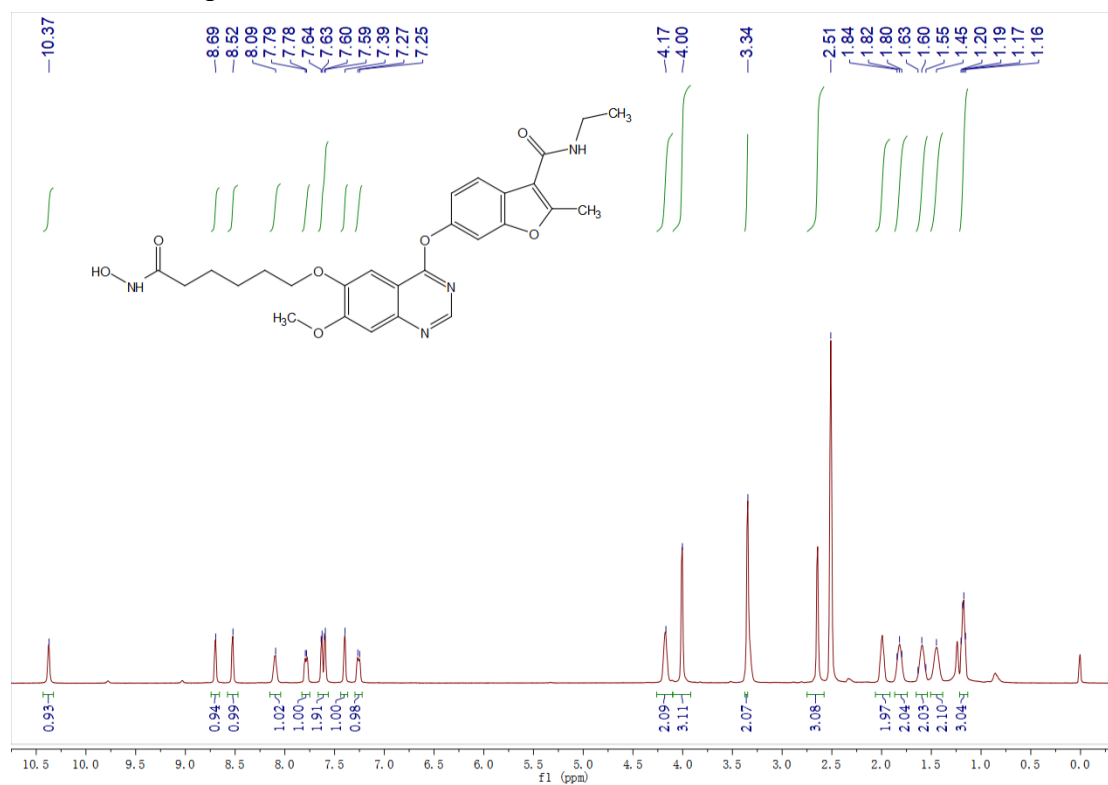

### <sup>13</sup>C-NMR of compound 22

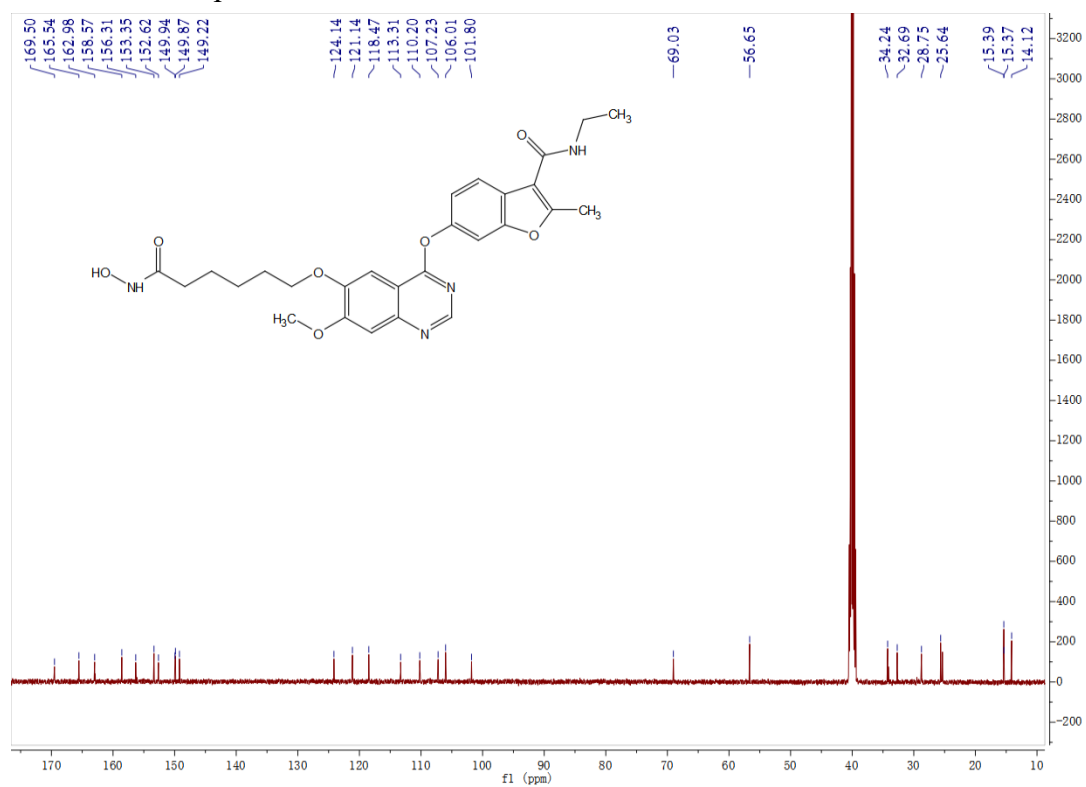

### <sup>1</sup>H-NMR of compound 23

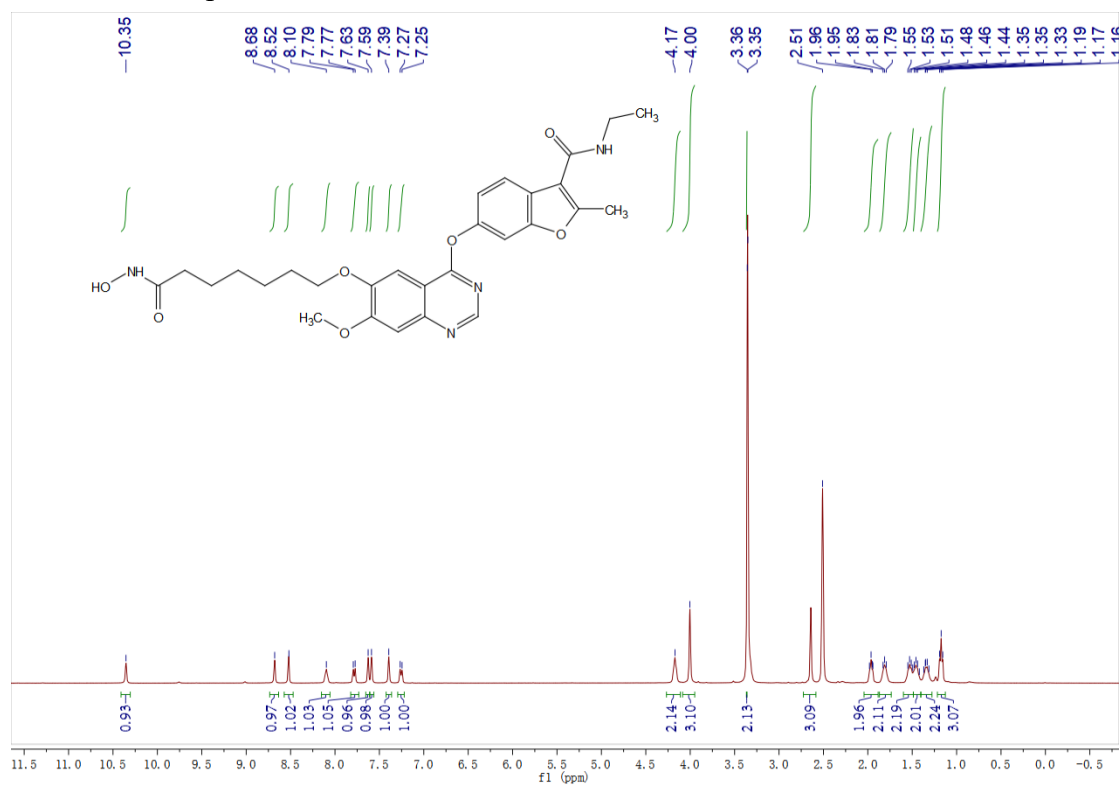

### <sup>13</sup>C-NMR of compound 23

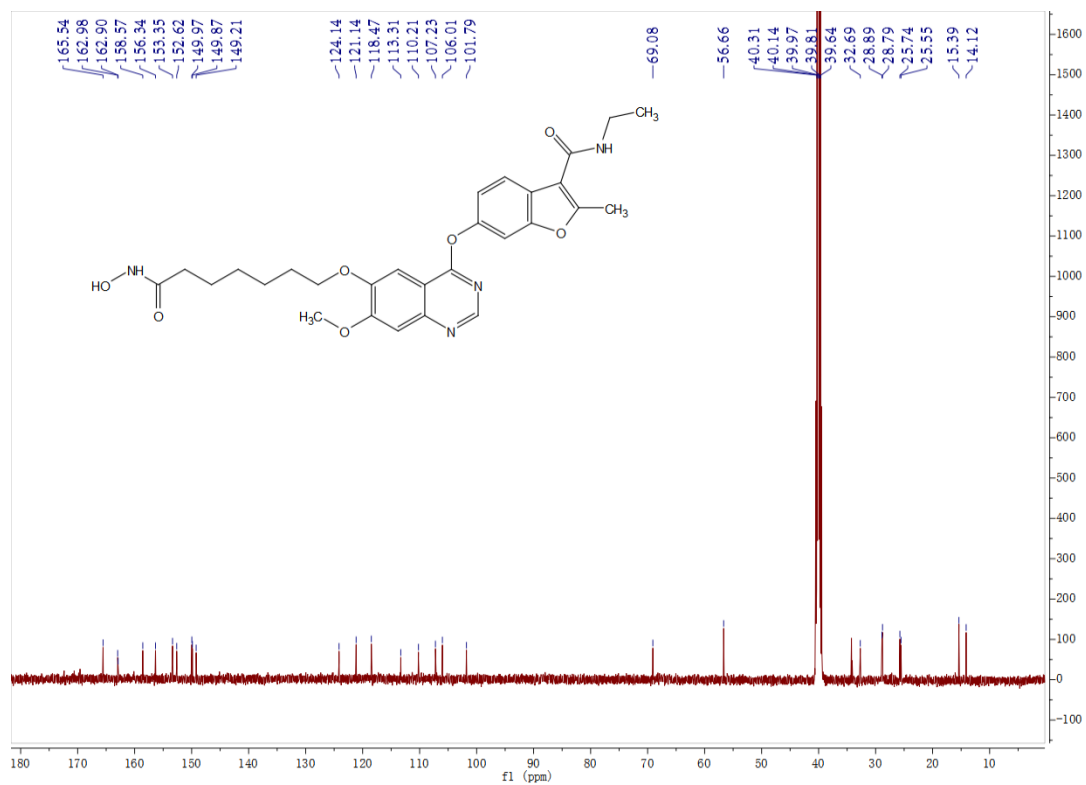



### <sup>1</sup>H-NMR of compound 24

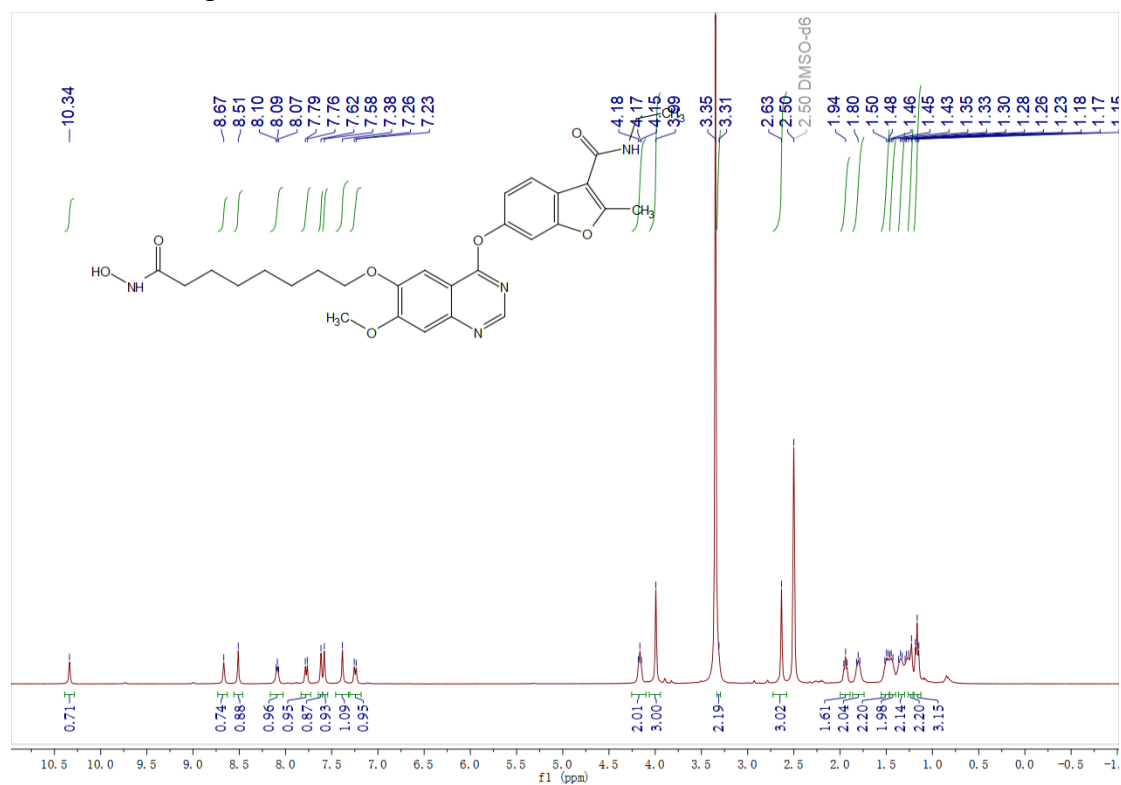

### <sup>13</sup>C-NMR of compound 24

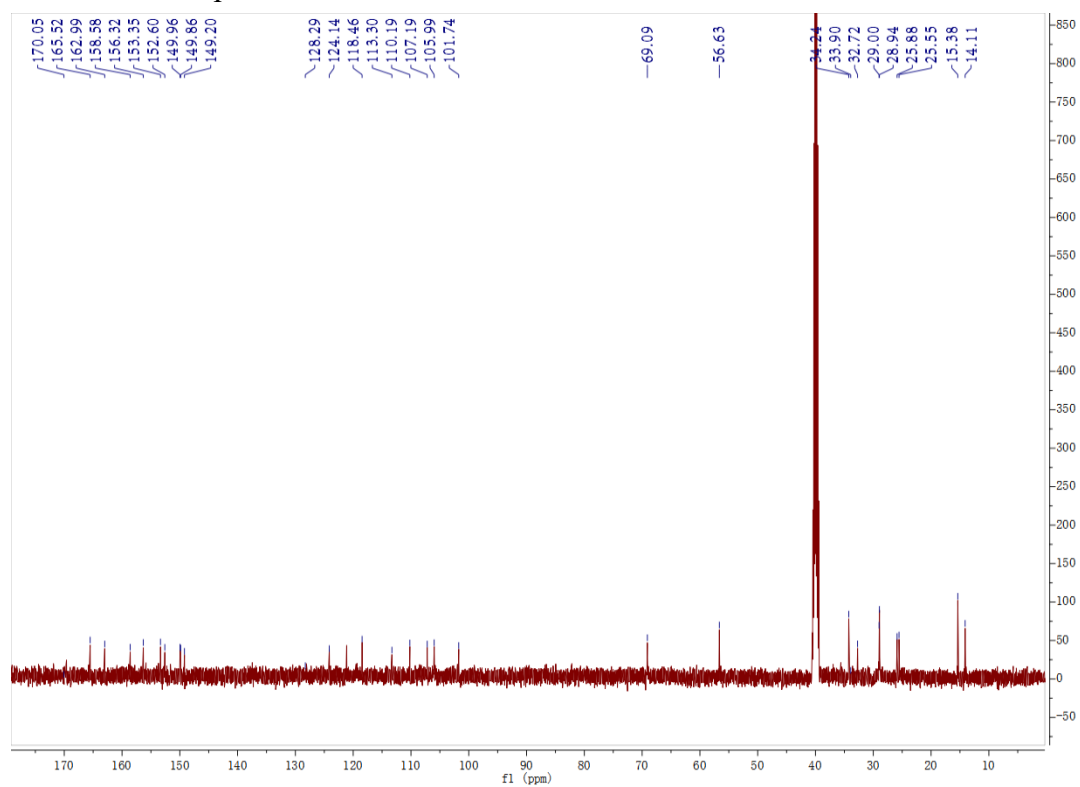

### <sup>1</sup>H-NMR of compound 25

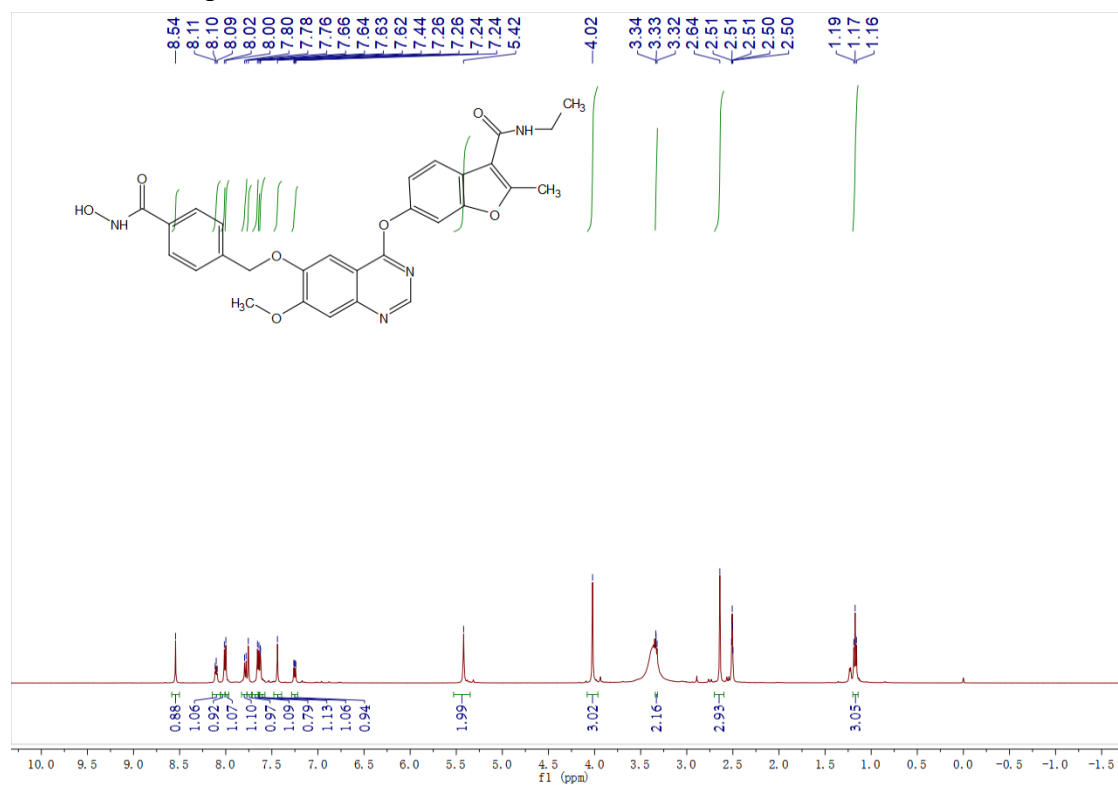

### <sup>13</sup>C-NMR of compound 25

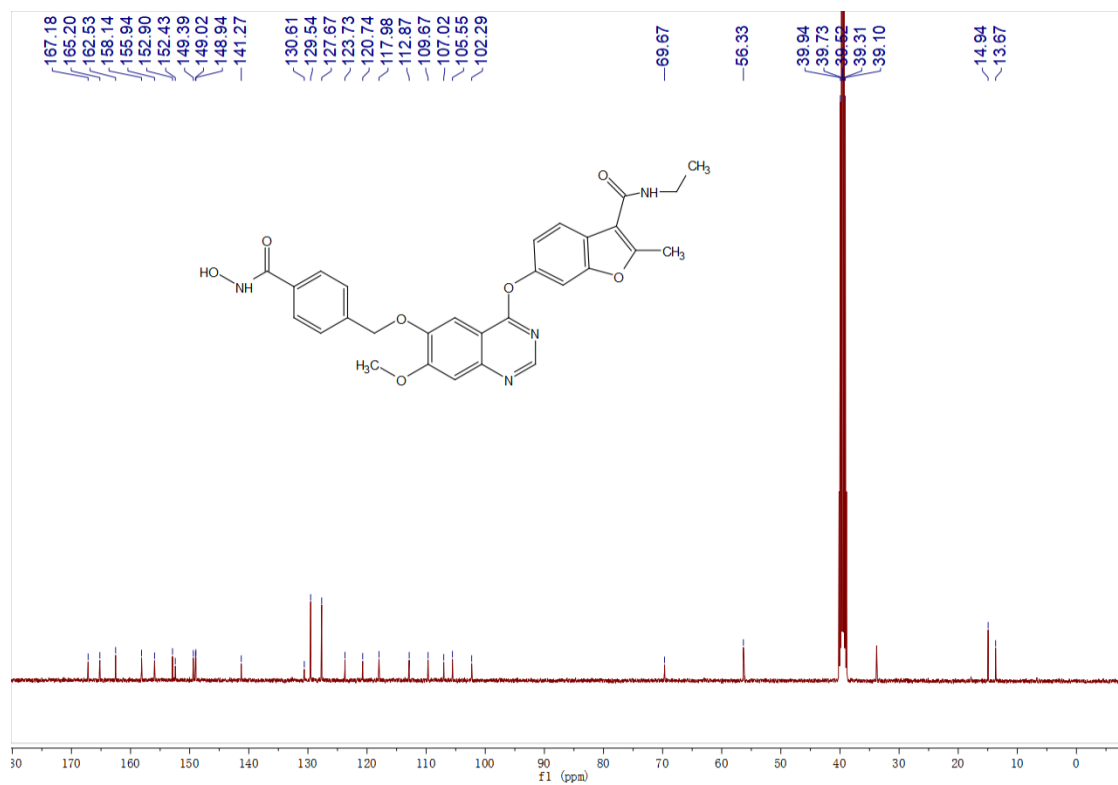

### <sup>1</sup>H-NMR of compound 26

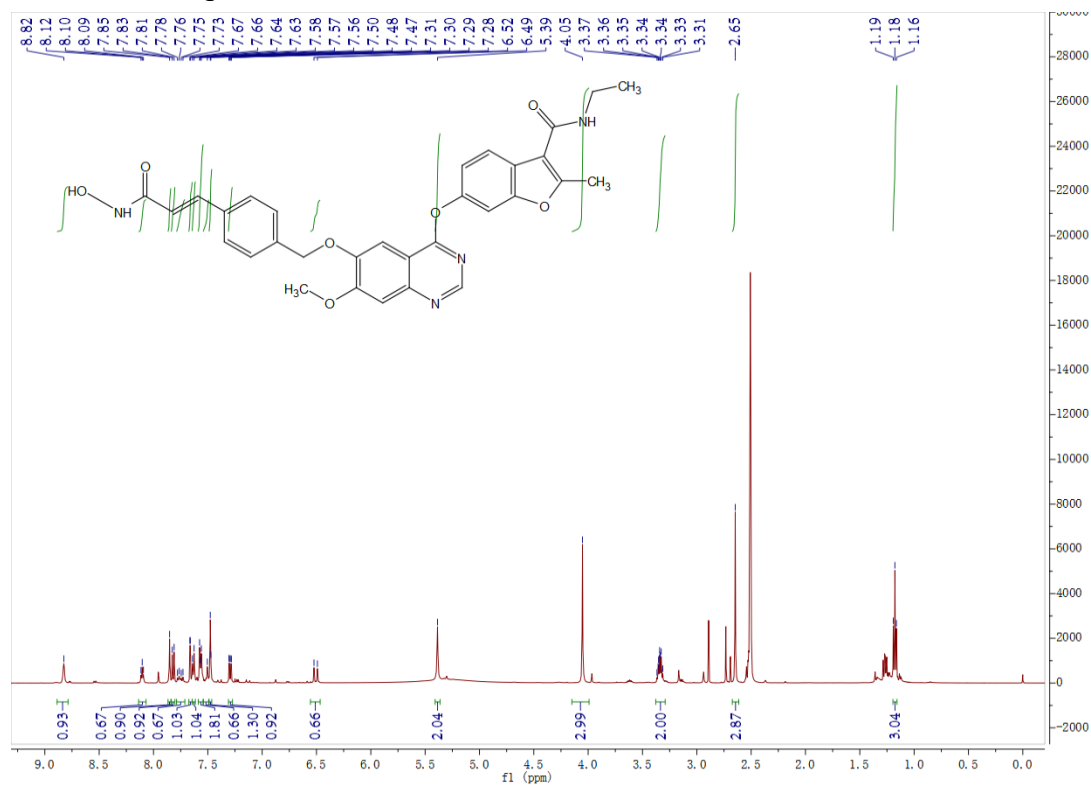

### <sup>13</sup>C-NMR of compound 26

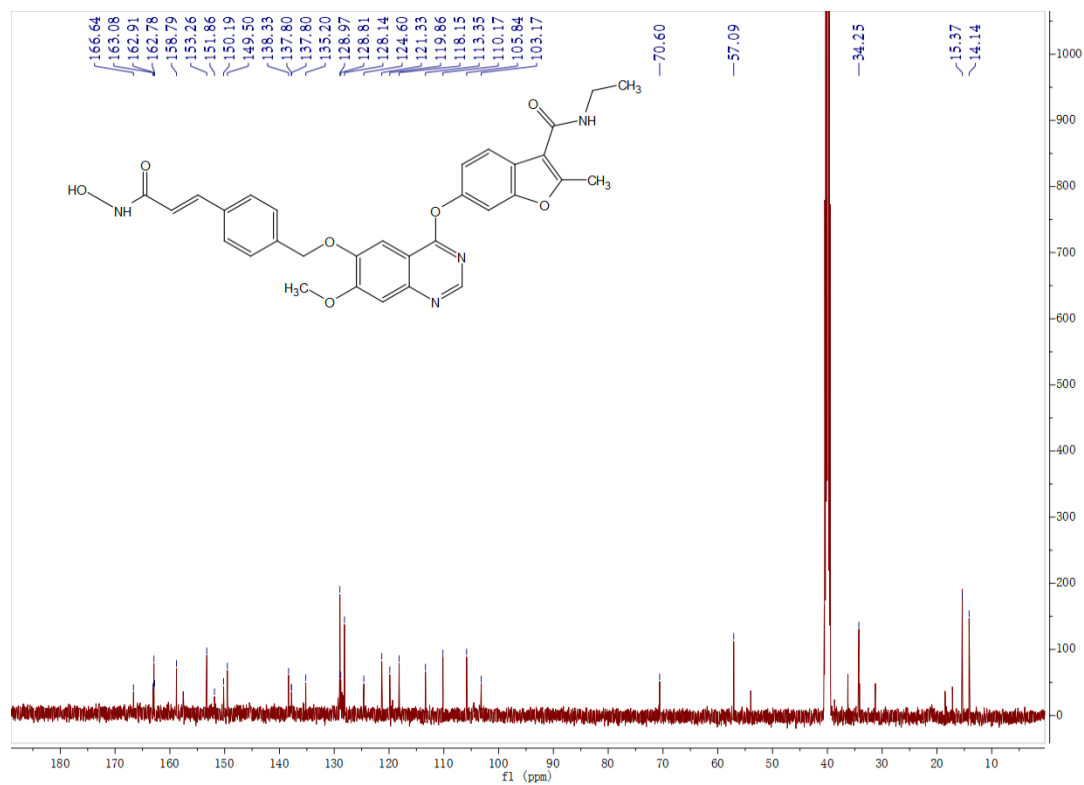

### <sup>1</sup>H-NMR of compound 27

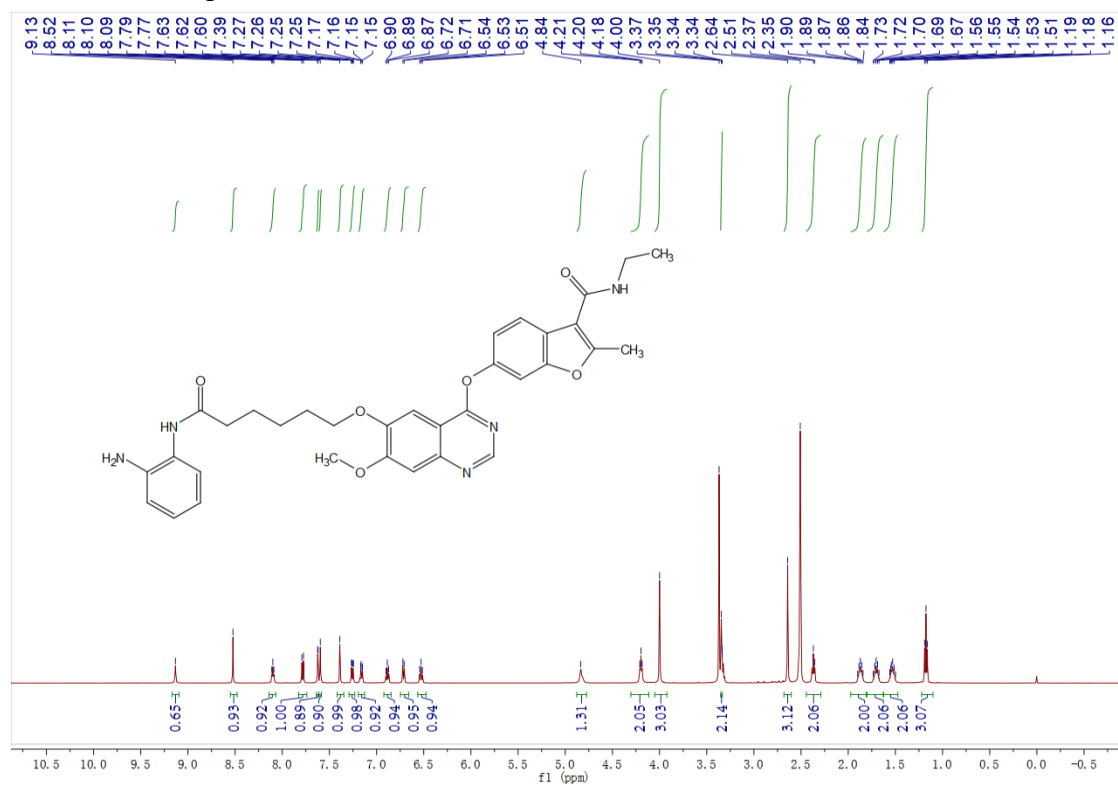

### <sup>13</sup>C-NMR of compound 27

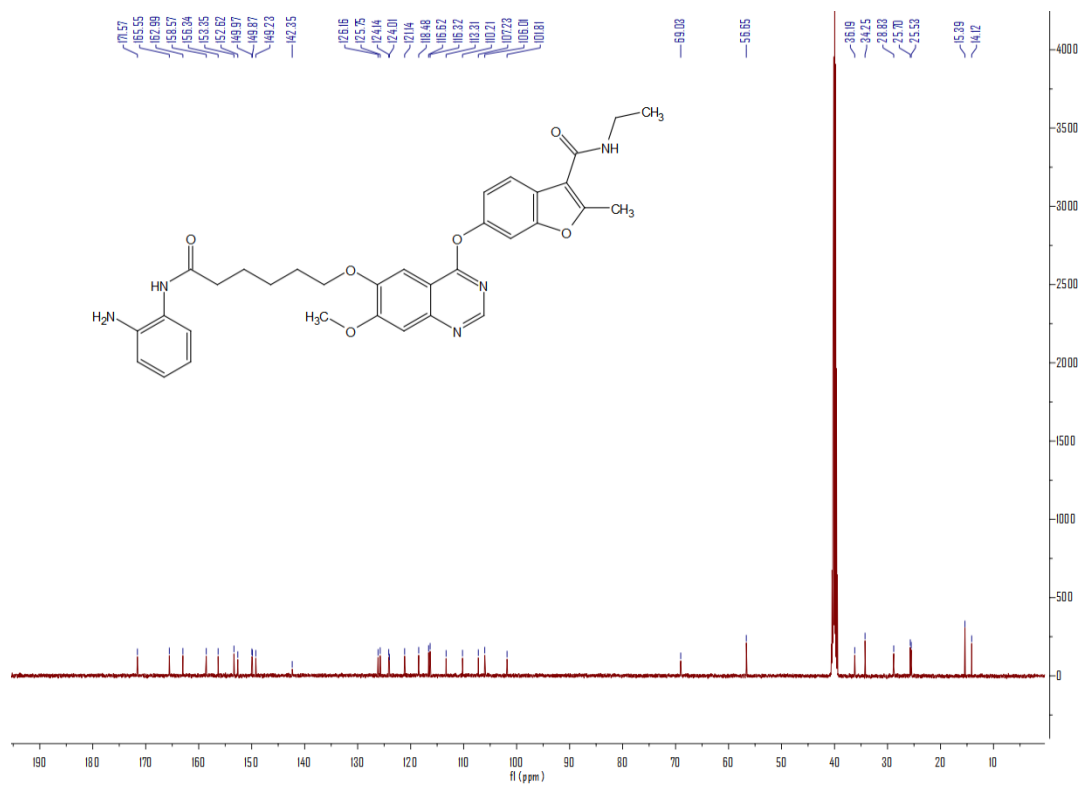

### <sup>1</sup>H-NMR of compound 28

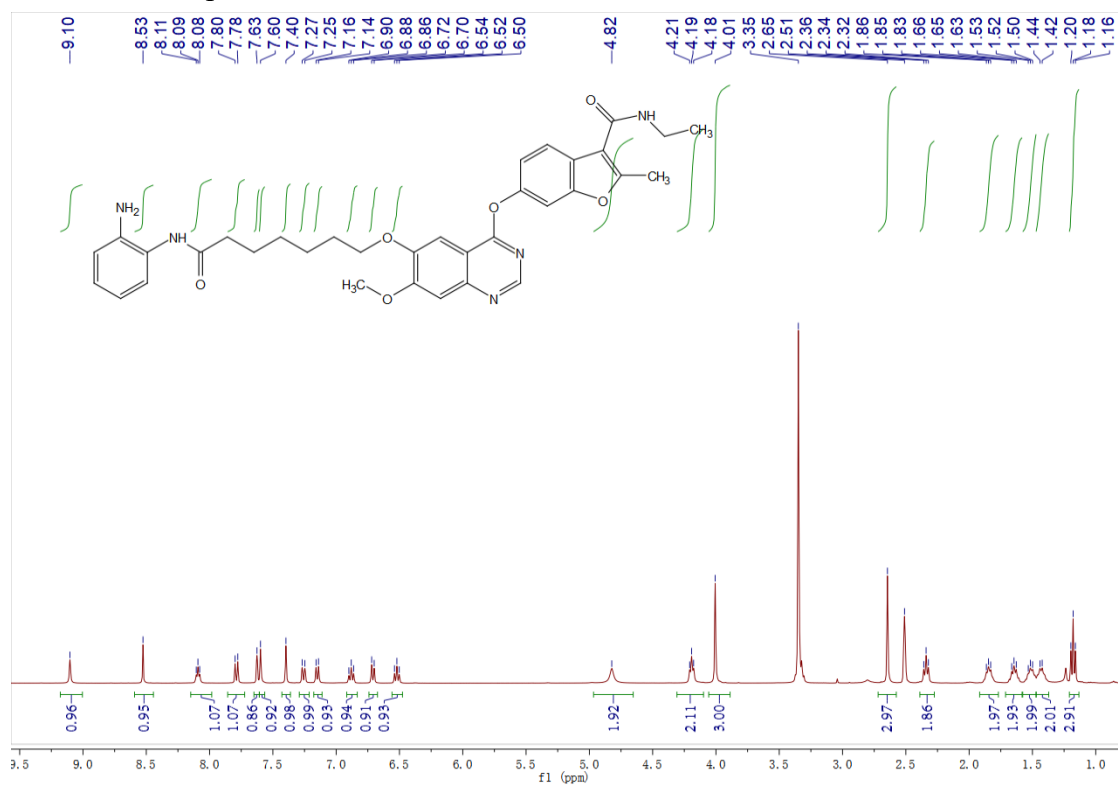

### <sup>13</sup>C-NMR of compound 28

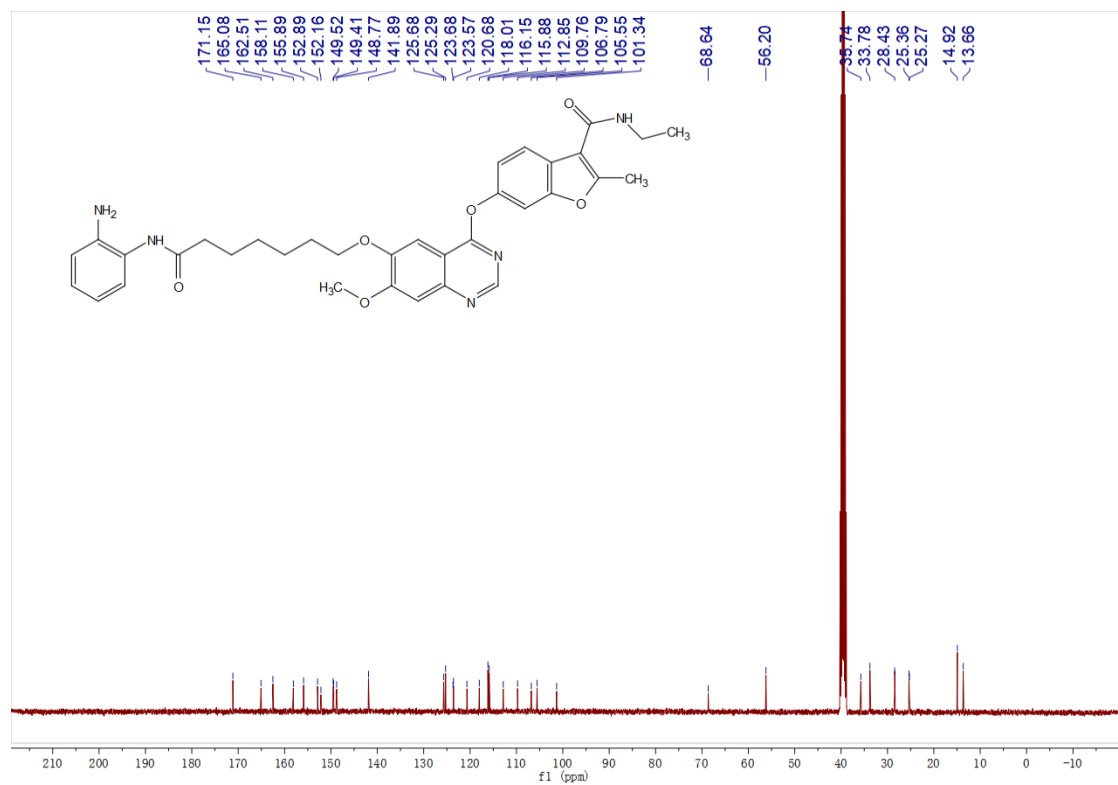

### <sup>1</sup>H-NMR of compound 29

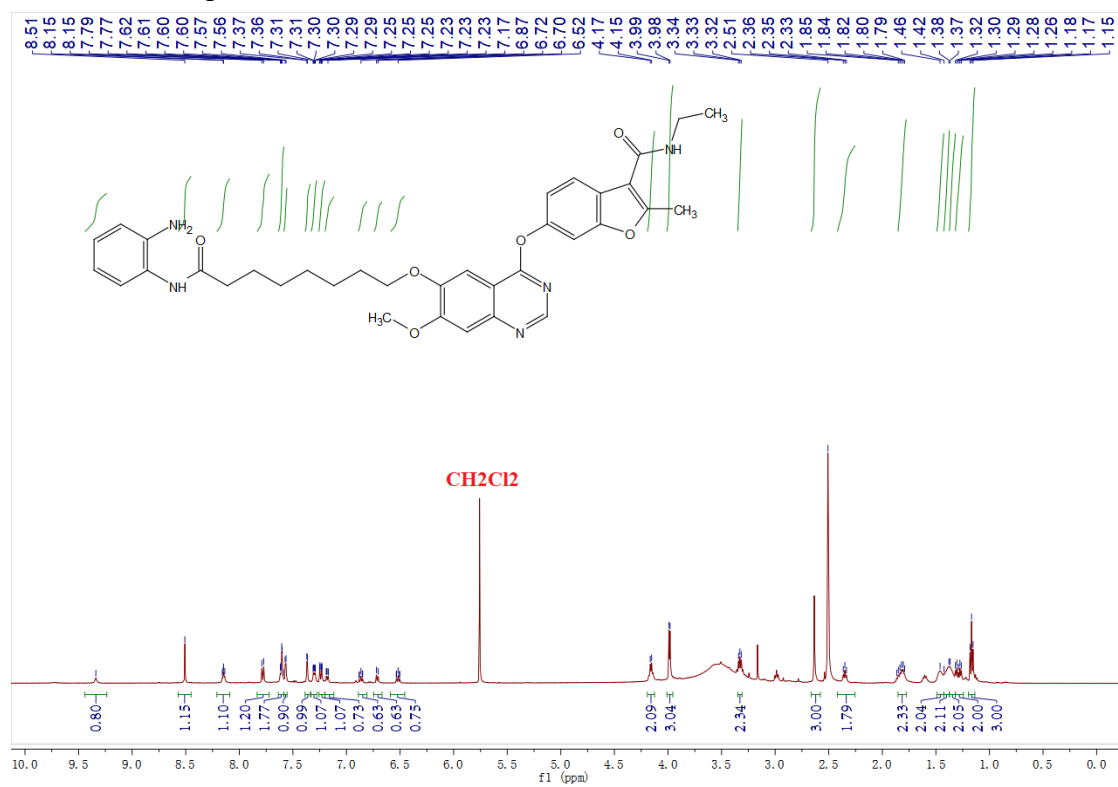

### <sup>13</sup>C-NMR of compound 29

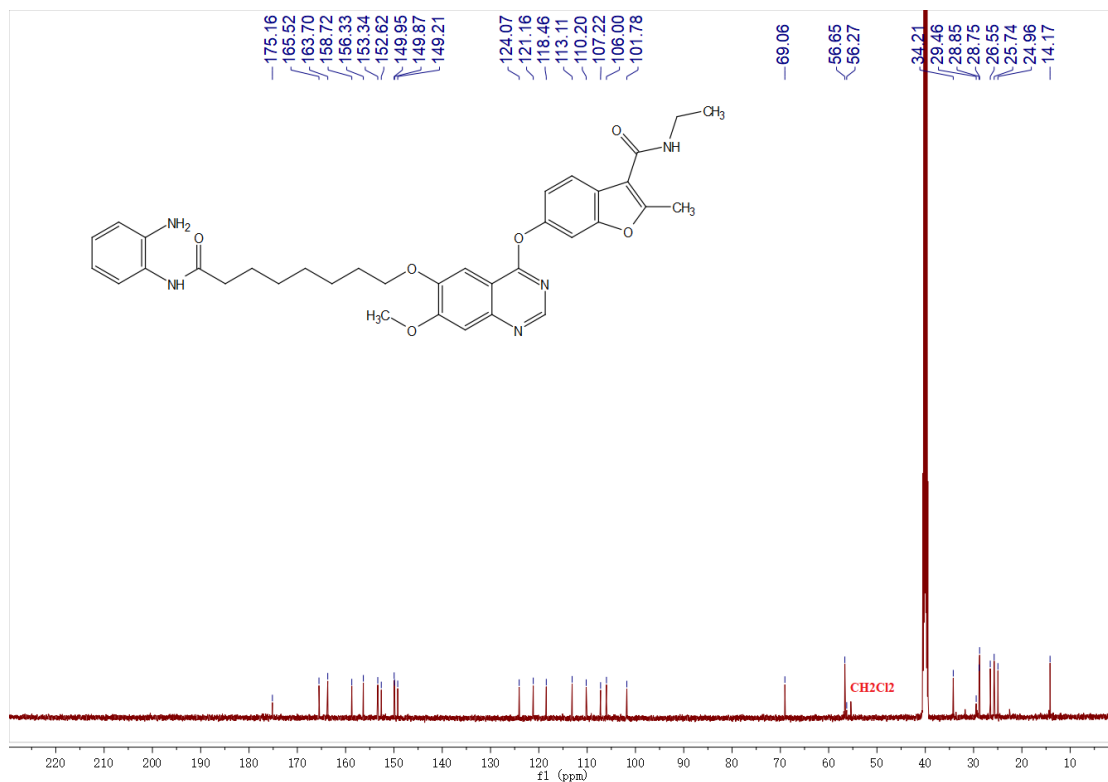

**<sup>1</sup>H-NMR of compound 30**

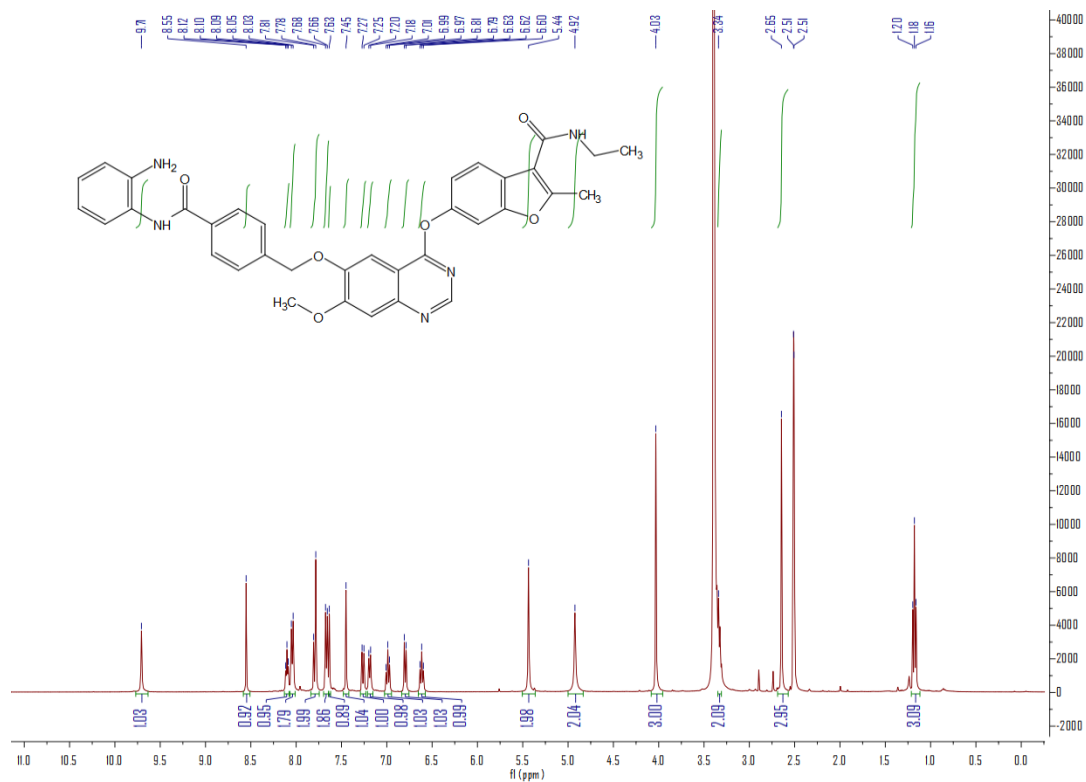

**<sup>13</sup>C-NMR of compound 30**

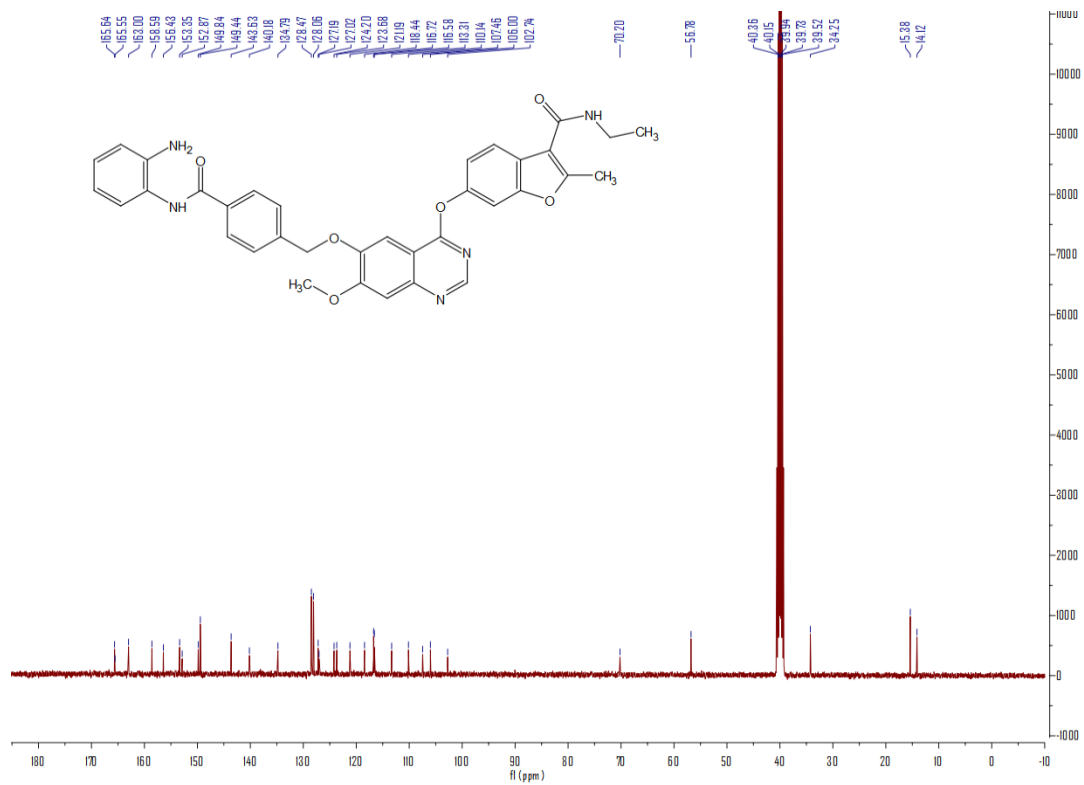

**<sup>1</sup>H-NMR of compound 31**

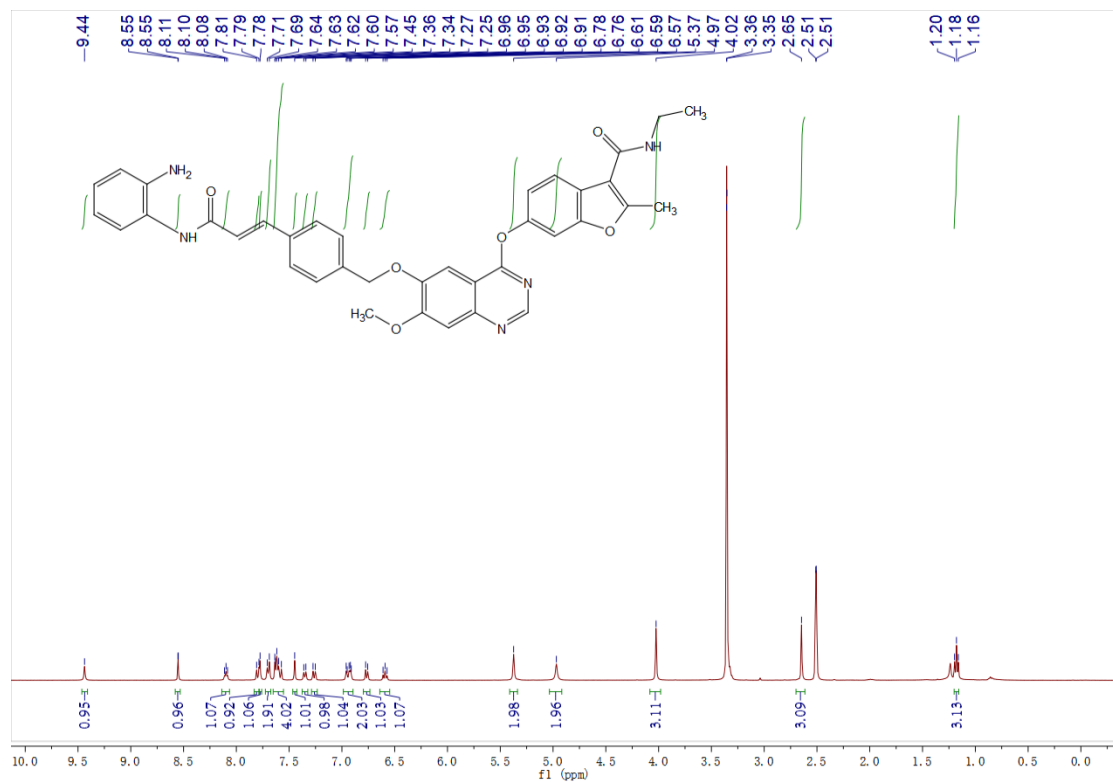

**<sup>13</sup>C-NMR of compound 31**



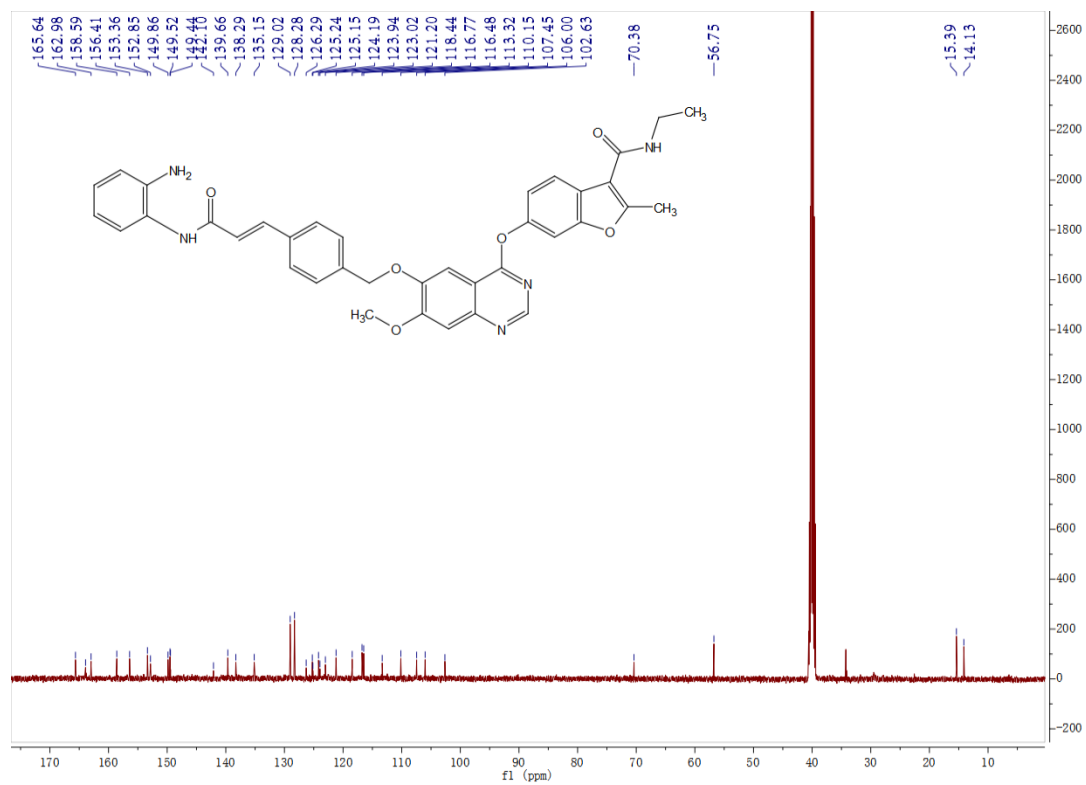

**<sup>1</sup>H-NMR of compound 32**

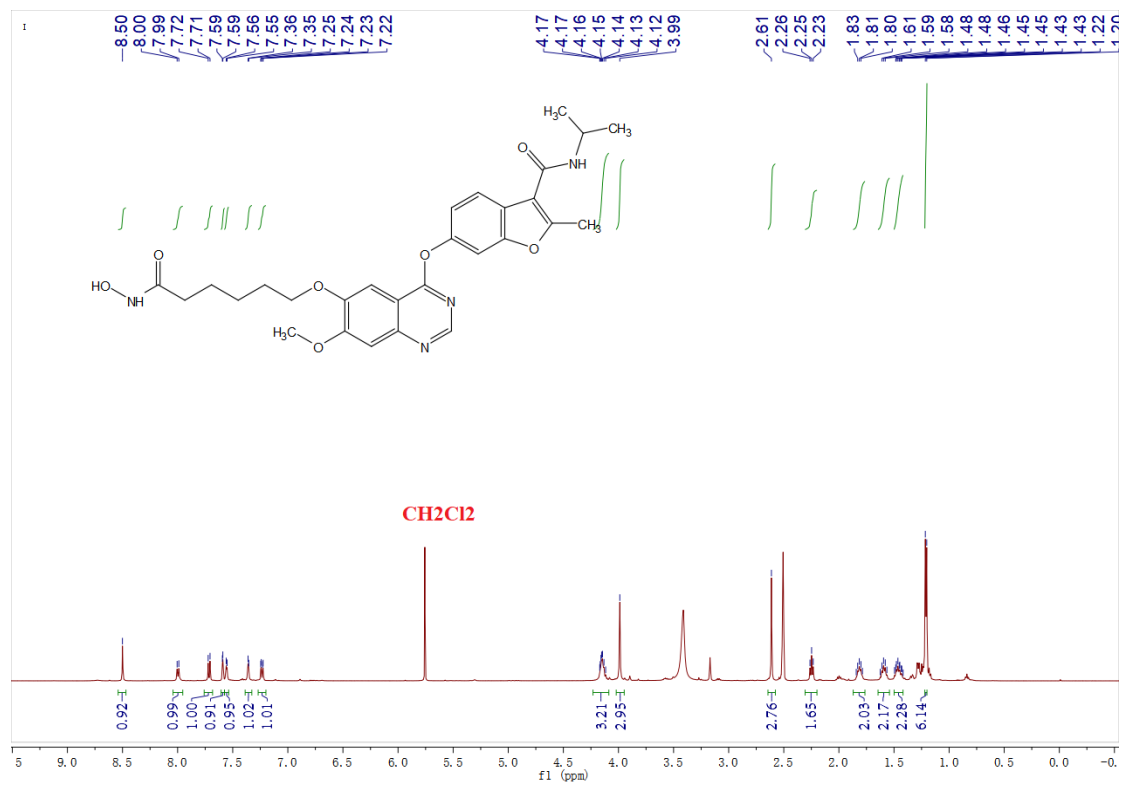

**<sup>13</sup>C-NMR of compound 32**

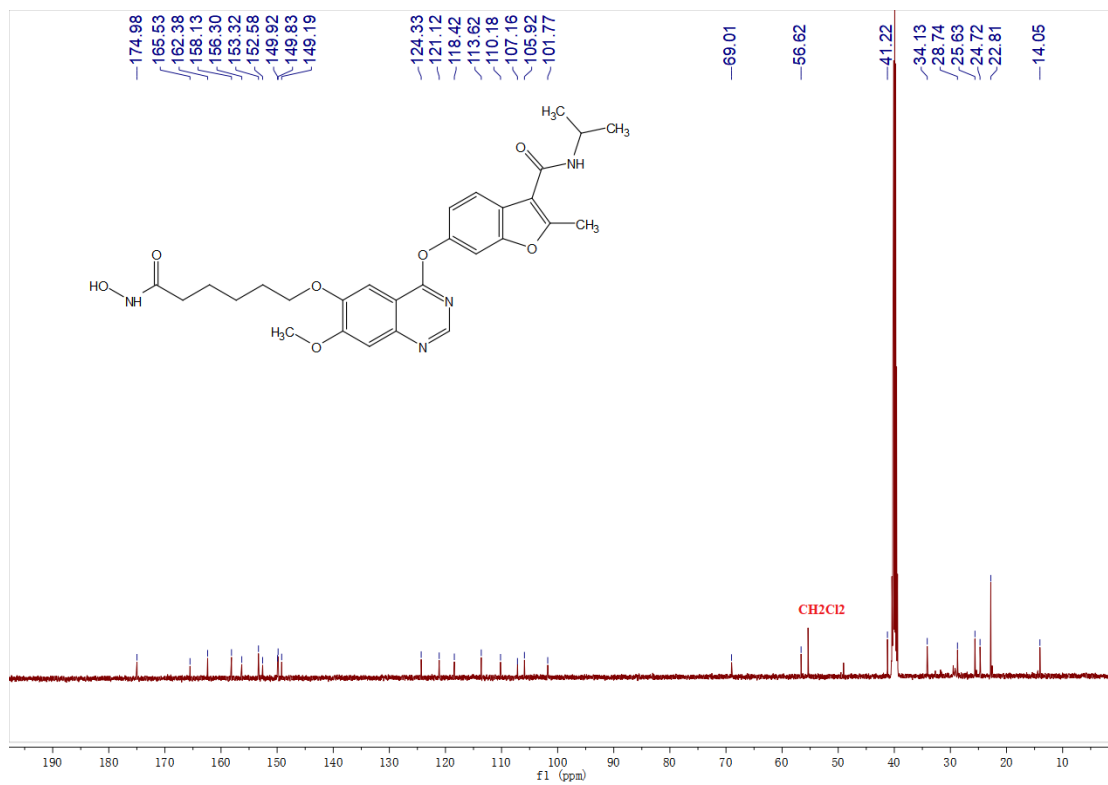

**<sup>1</sup>H-NMR of compound 33**

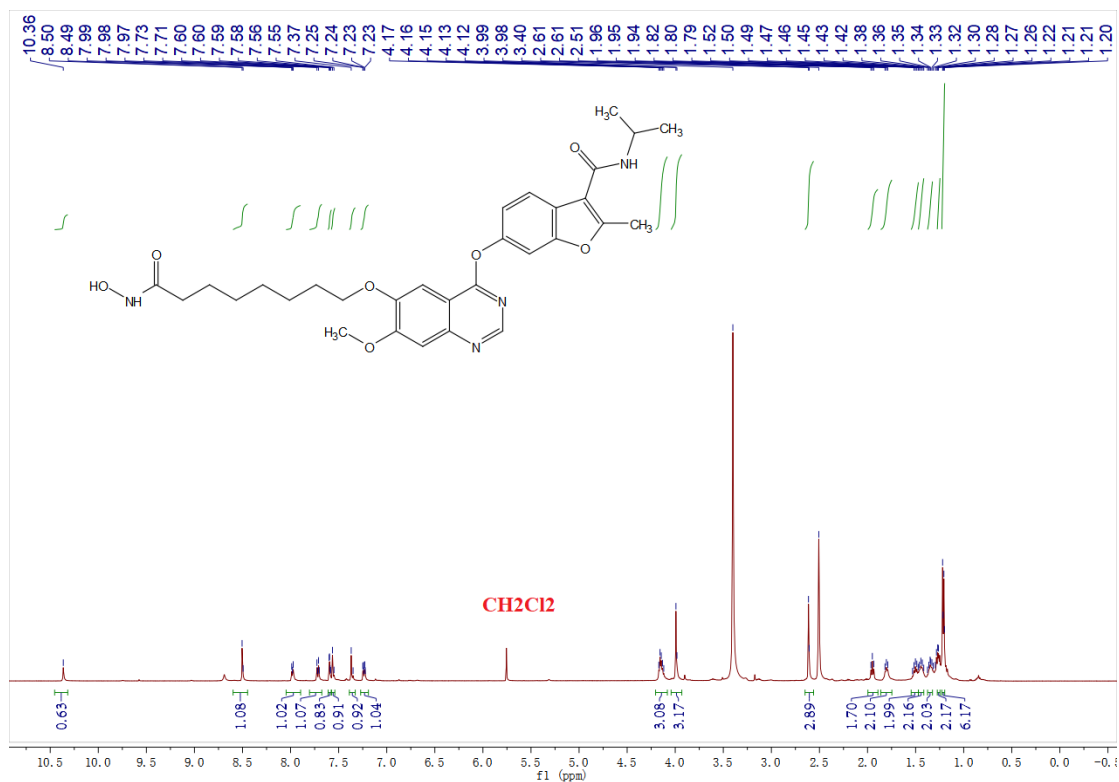

**<sup>13</sup>C-NMR of compound 33**

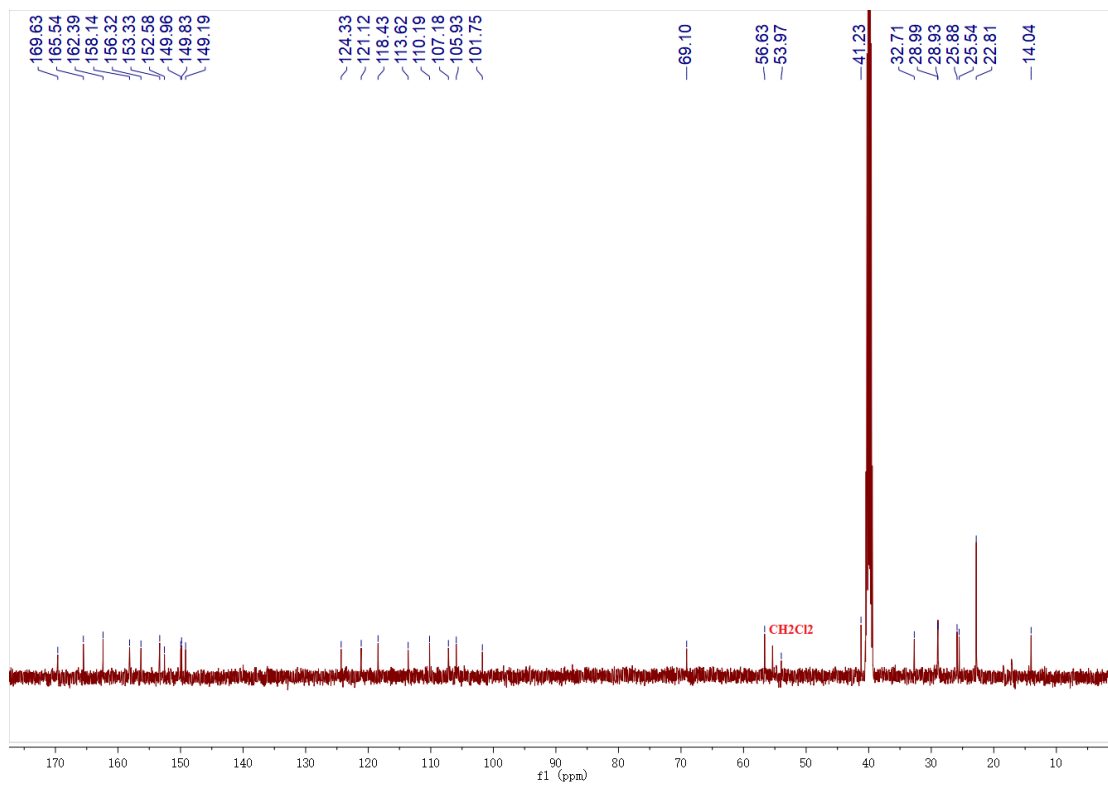

**<sup>1</sup>H-NMR of compound 34**

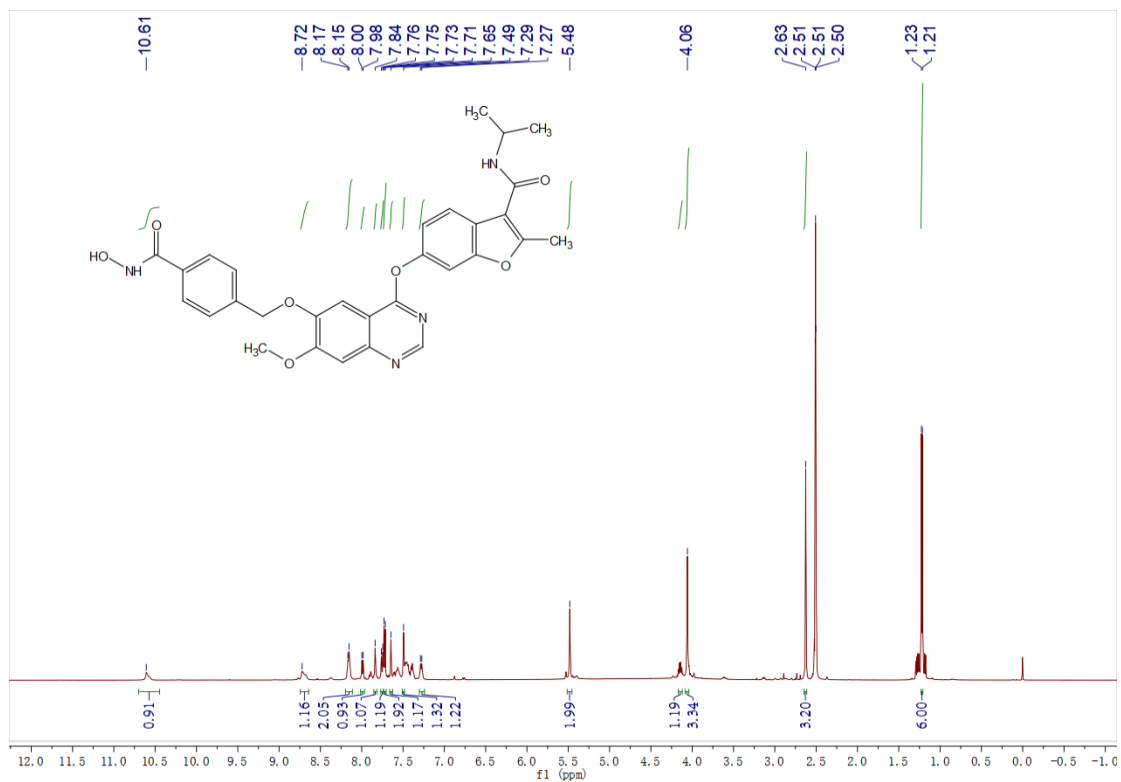

**<sup>13</sup>C-NMR of compound 34**

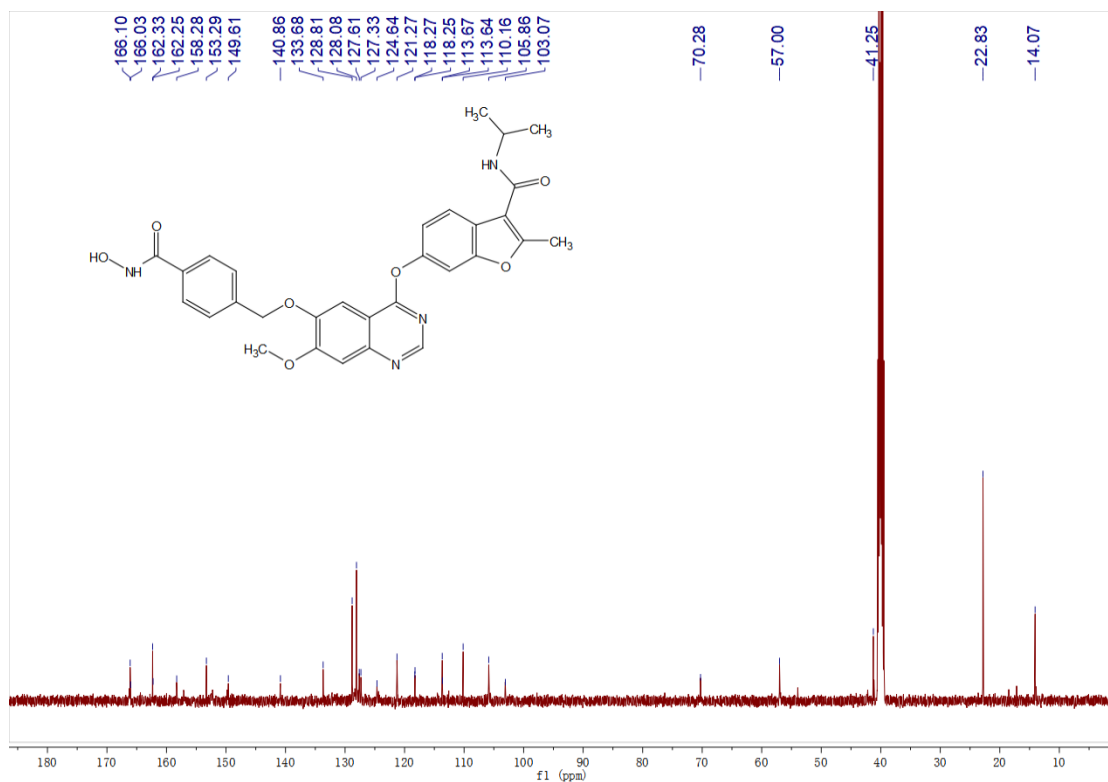

**<sup>1</sup>H-NMR of compound 35**

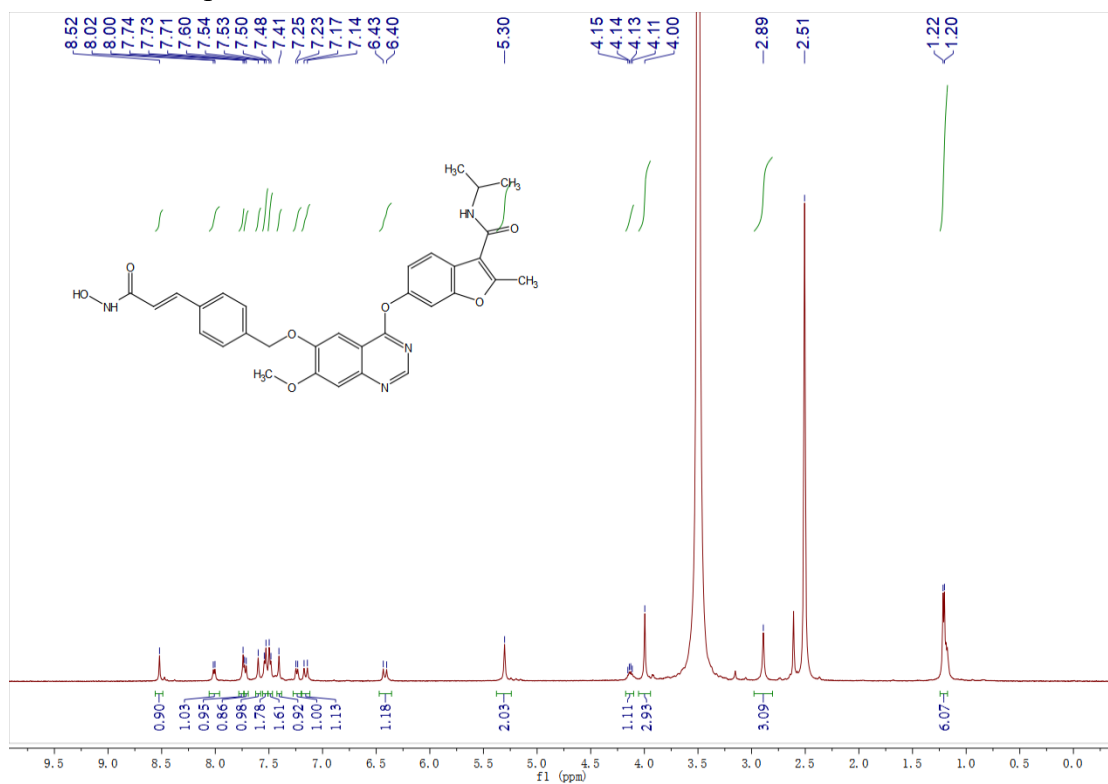

**<sup>13</sup>C-NMR of compound 35**

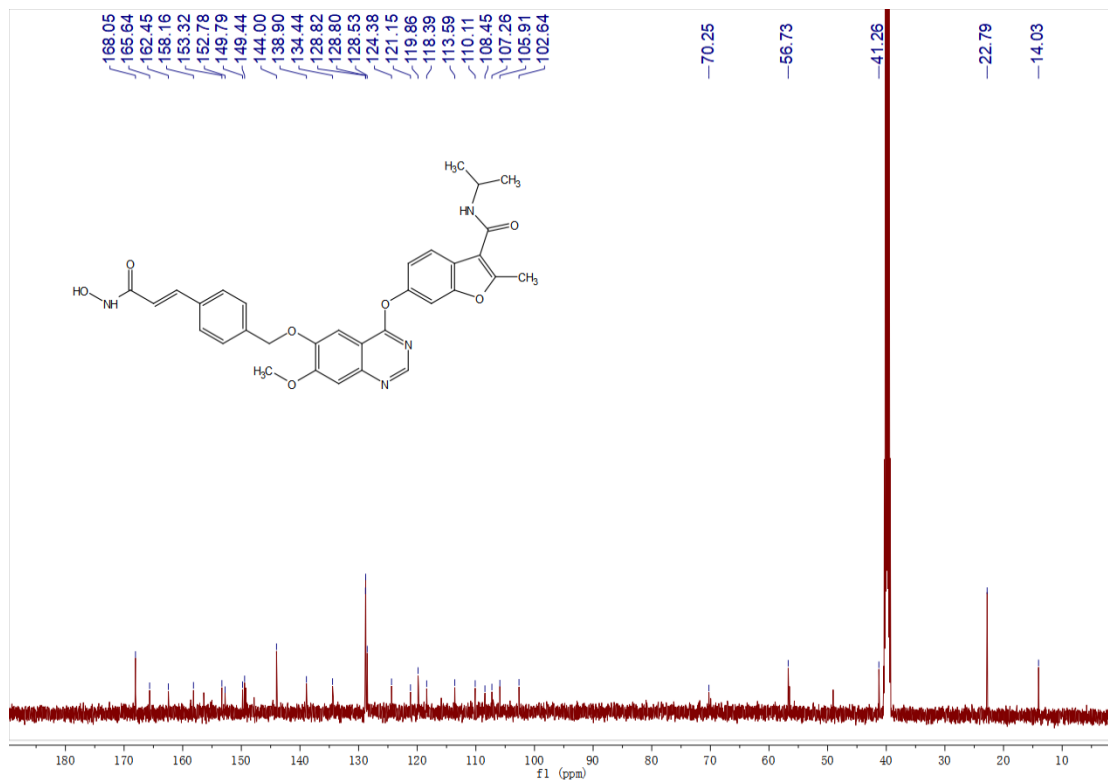

**<sup>1</sup>H-NMR of compound 36**

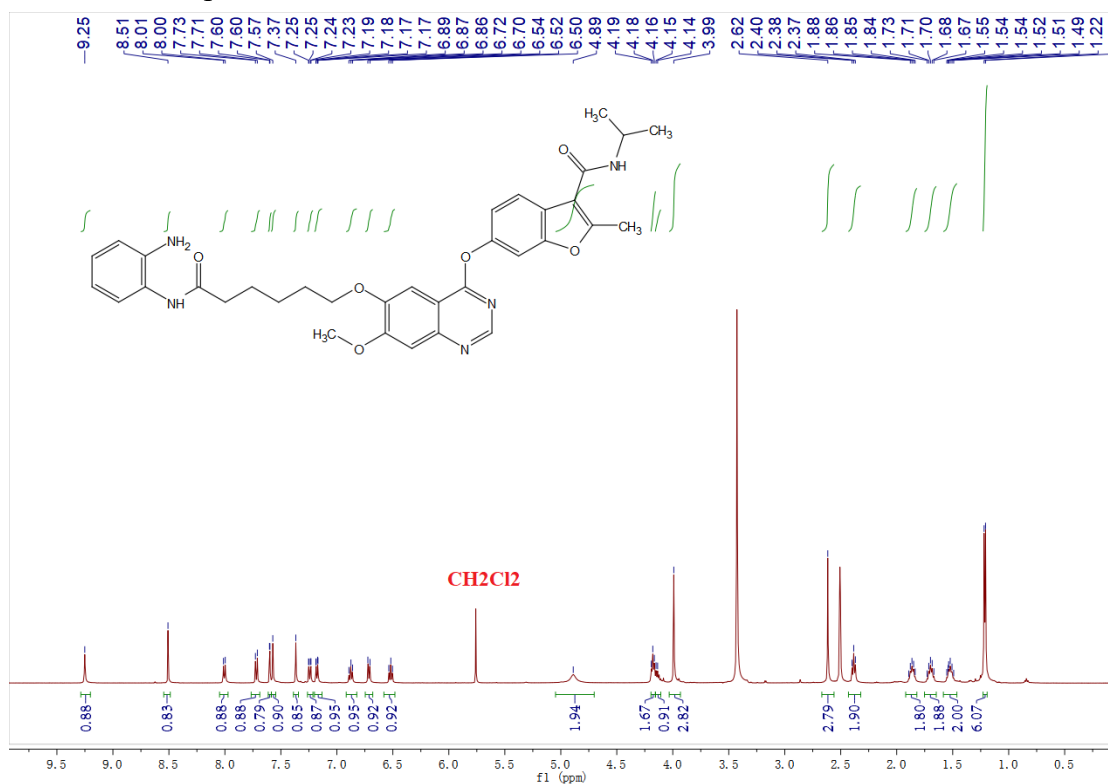

**<sup>13</sup>C-NMR of compound 36**

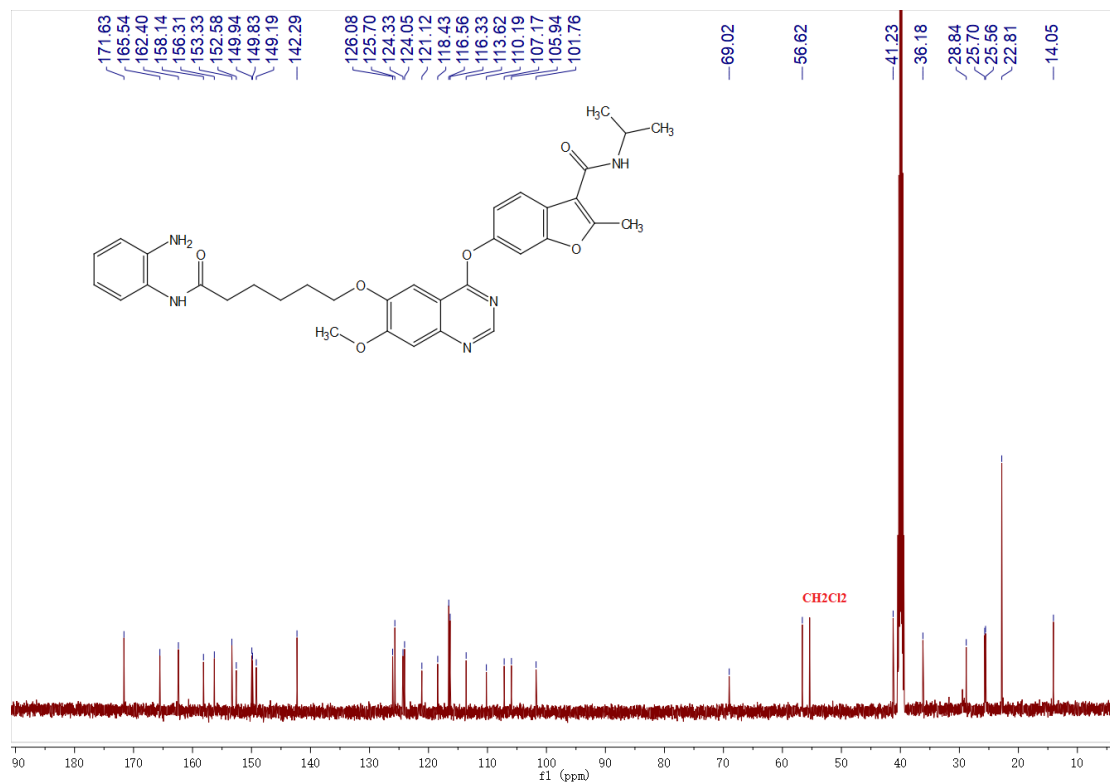

<sup>1</sup>H-NMR of compound 37

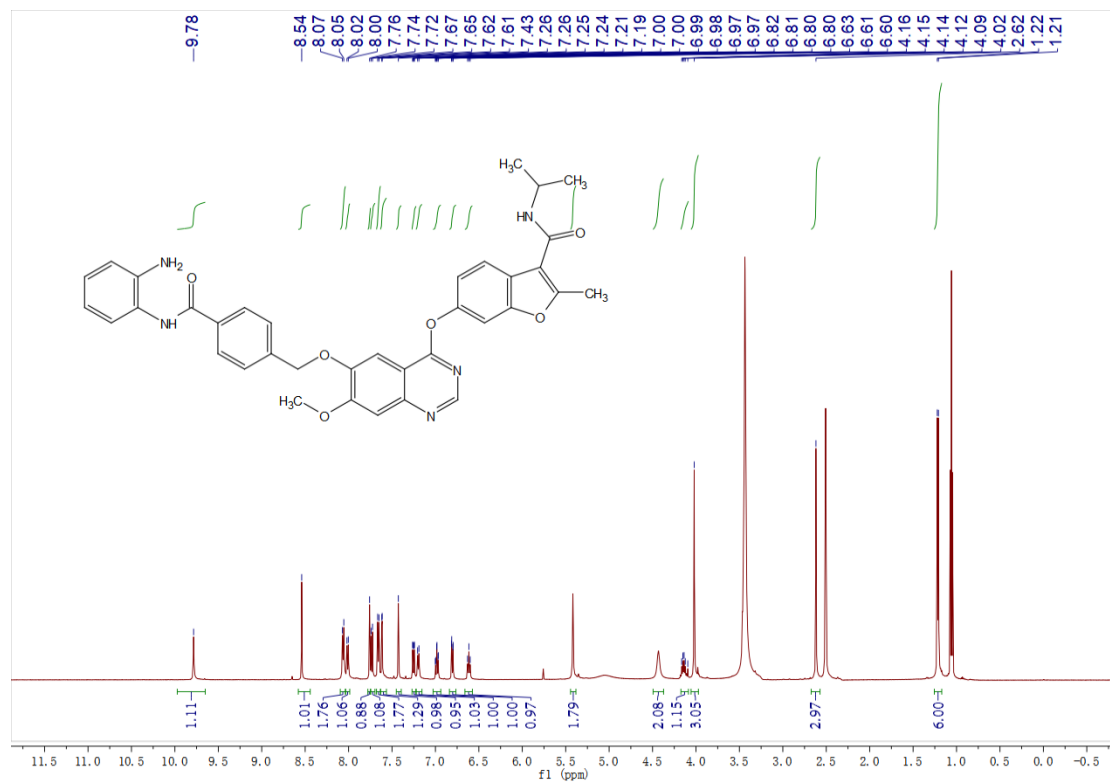

<sup>13</sup>C-NMR of compound 37

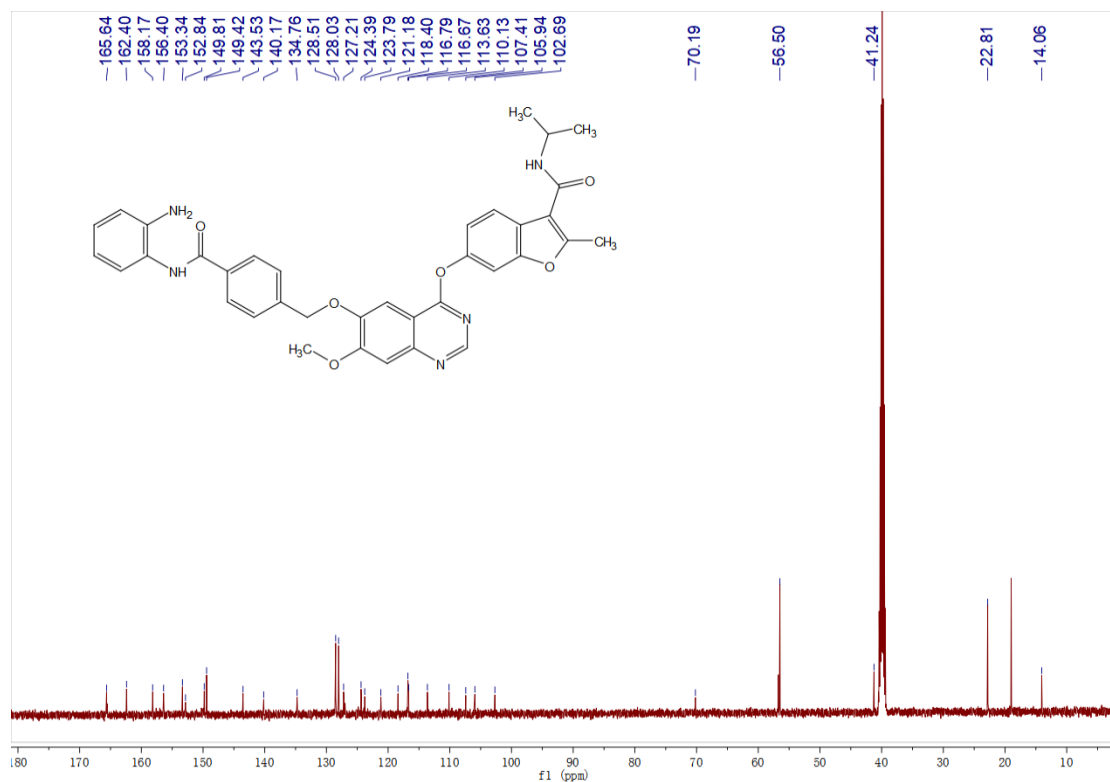

<sup>1</sup>H-NMR of compound 38

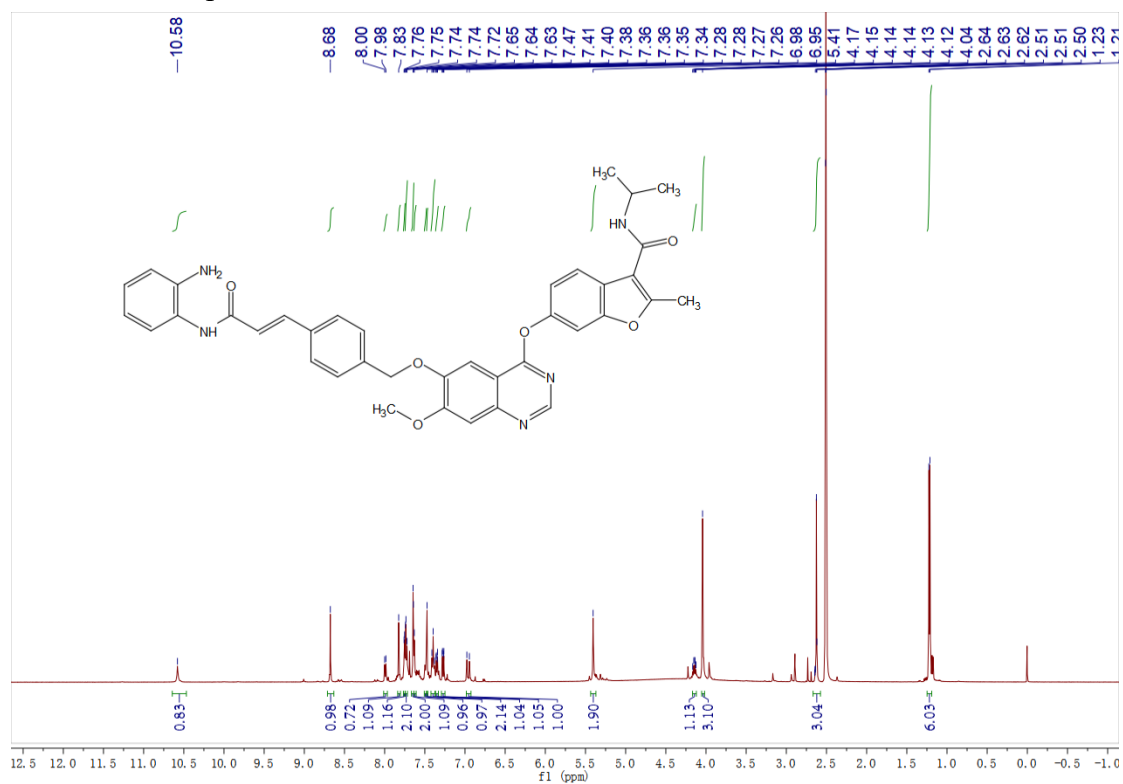

<sup>13</sup>C-NMR of compound 38

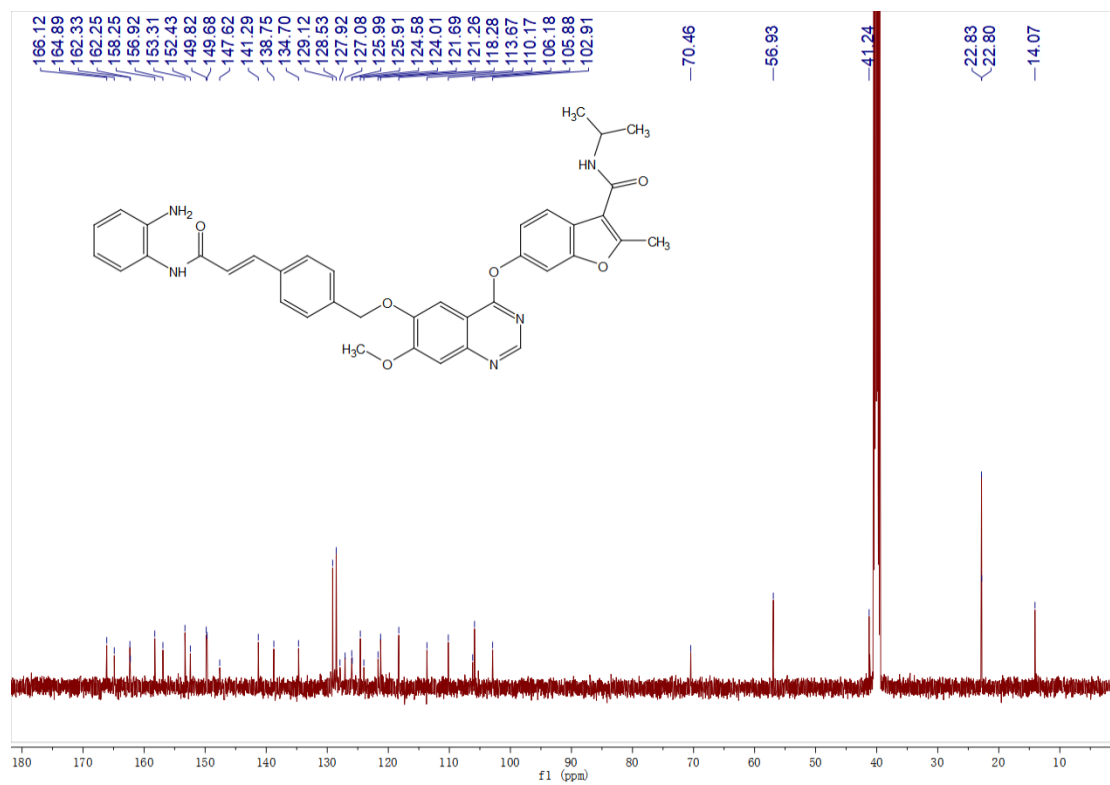

Supplement: d3ra05542f1.pdf [file d3ra05542f1.pdf]
